# Supplementary material
Source: PubMed Central journal article supplement (PMC8991407)
Supplement: NIHMS1790725-supplement-Supplemental_Materials.pdf [file NIHMS1790725-supplement-Supplemental_Materials.pdf]

## SUPPLEMENTAL INFORMATION

### **The volume regulated anion channel LRRC8C suppresses T cell function by regulating cyclic dinucleotide transport and STING-p53 signaling**

Axel R. Concepcion,<sup>1</sup> Larry E. Wagner II,<sup>4</sup> Jingjie Zhu,<sup>1</sup> Anthony Y. Tao,<sup>1</sup> Jun Yang,<sup>1</sup> Alireza Khodadadi-Jamayran,<sup>2</sup> Yin-Hu Wang,<sup>1</sup> Menghan Liu,<sup>1</sup> Rebecca E. Rose,<sup>3</sup> Drew R. Jones,<sup>3</sup> William A. Coetzee,<sup>1</sup> David I. Yule,<sup>4</sup> and Stefan Feske<sup>1</sup>

<sup>1</sup>Department of Pathology, <sup>2</sup>Applied Bioinformatics Laboratories, <sup>3</sup>Metabolomics Core Resource Laboratory, New York University Grossman School of Medicine, New York, NY 10016, USA

<sup>4</sup>Department of Pharmacology and Physiology, University of Rochester, 601 Elmwood Ave, Rochester. NY 14642, USA.

**Supplemental Figure 1**  
(associated with Figure 1d,e)

**a**

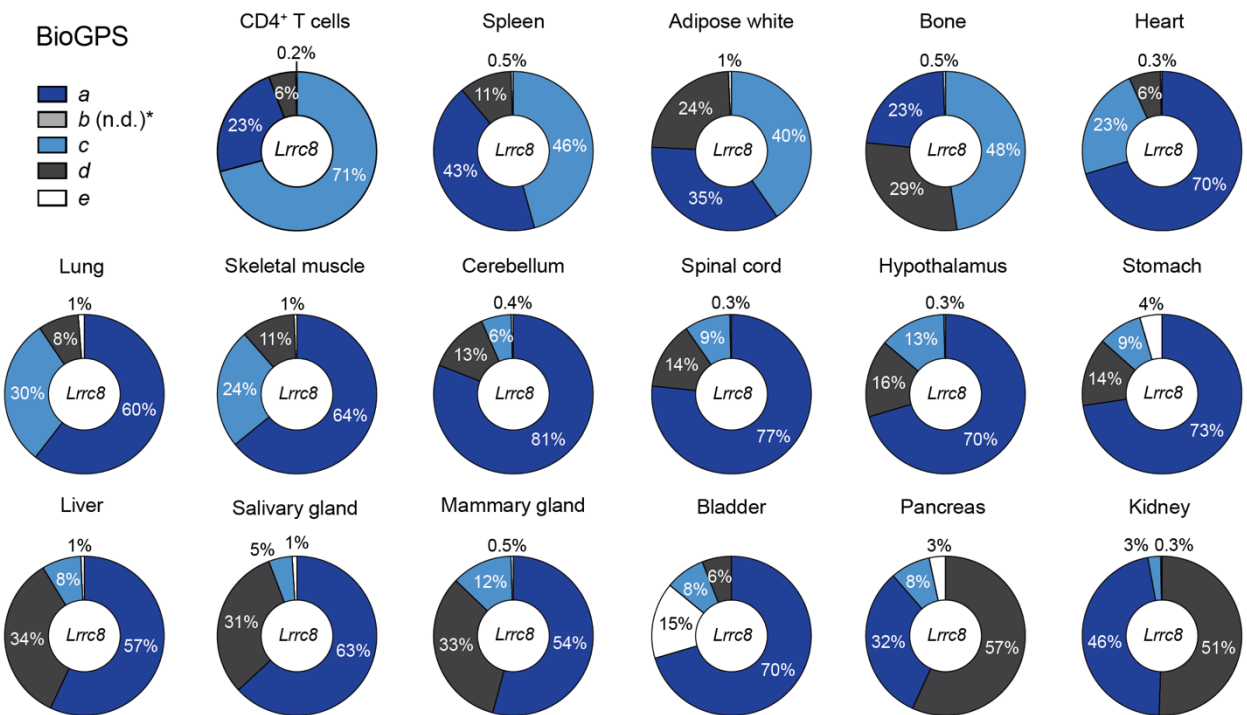

**b**

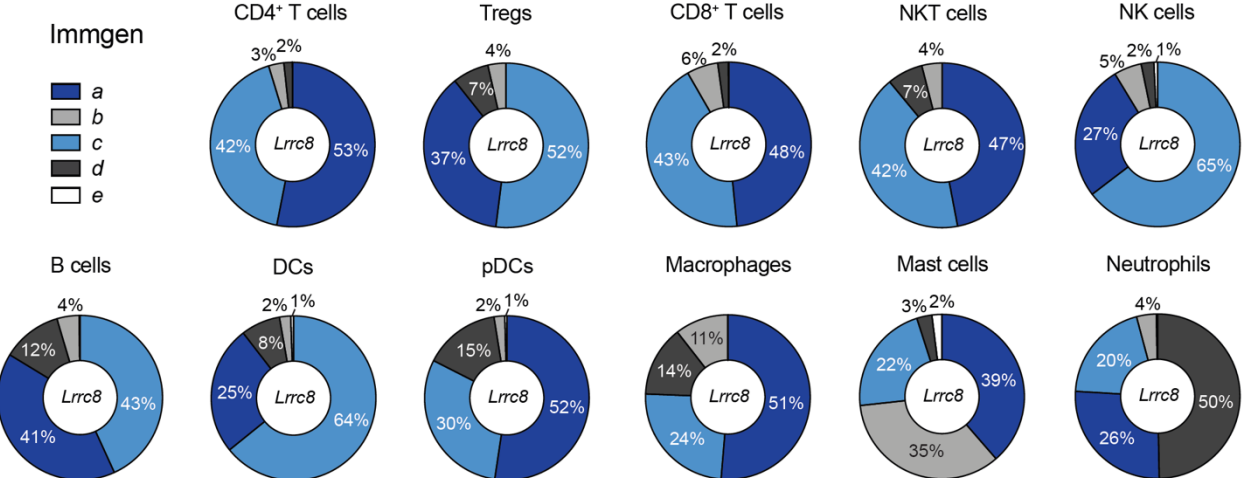

**c**

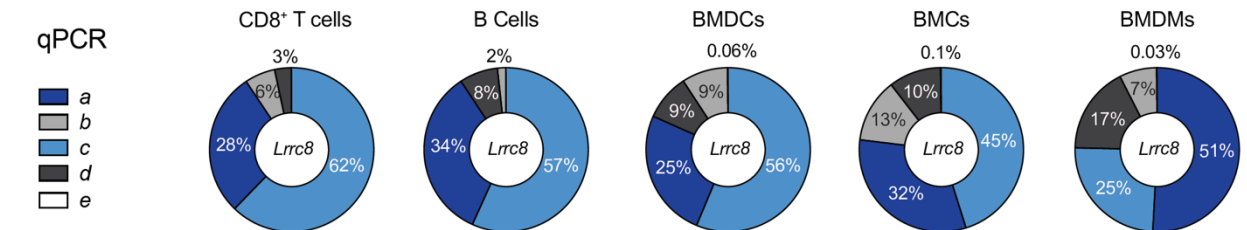

**Supplemental Figure 1. Transcriptional expression of *Lrrc8* genes in different immune cells and tissues. (a-c) Pie chart showing the proportion of *Lrrc8* gene expression in murine cells from (a) BioGPS microarray gene atlas MOE340, (b) ImmGen RNA-Seq database and (c) validated by RT-qPCR. Note that *Lrrc8b* gene expression in (a) was not available from the BioGPS dataset. Data in (c) was pooled from at least 2 independent experiments and 3 WT mice.**

**Supplemental Figure 2**  
(associated with Figure 1l,m)

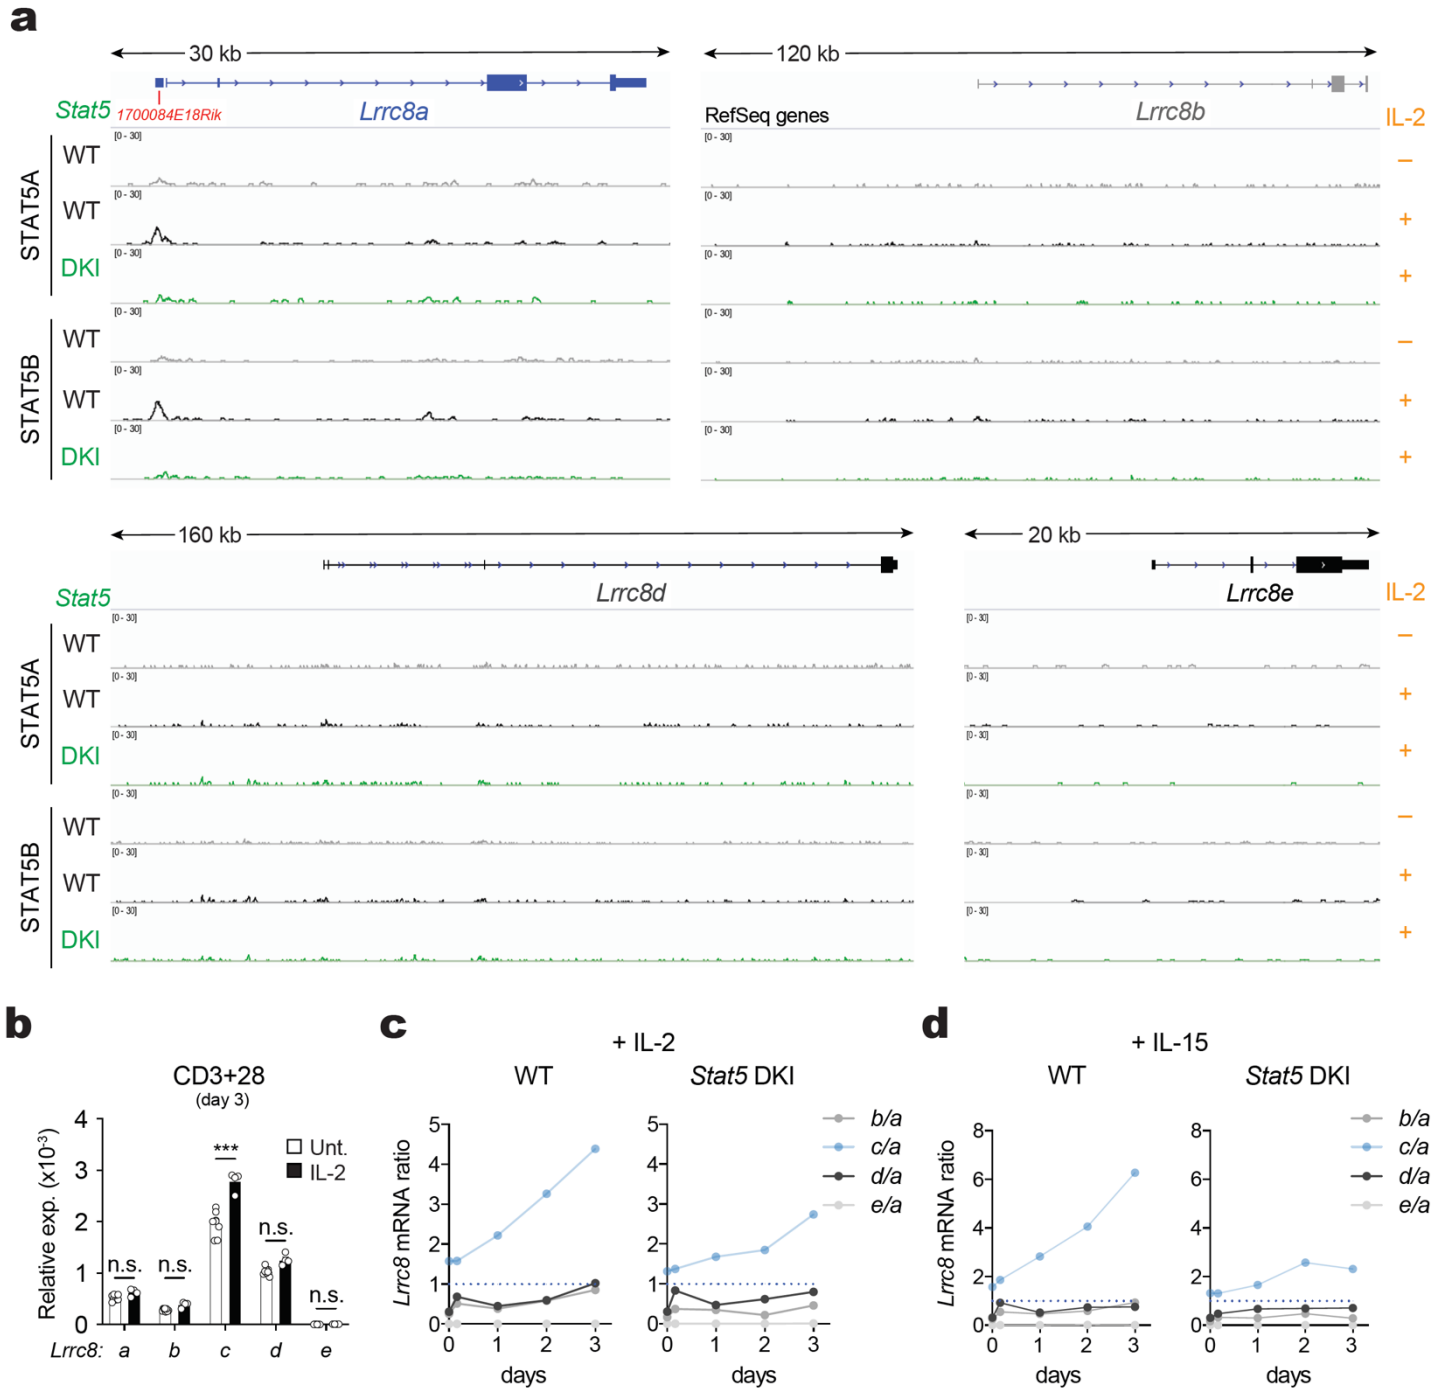

**Supplemental Figure 2. *Lrrc8* genes other than *Lrrc8c* lack STAT5 binding motifs in T cells. (a)** *In silico* analysis of *Lrrc8a*, *Lrrc8b*, *Lrrc8d*, and *Lrrc8e* gene loci for chromatin accessibility in activated T cells from WT and *Stat5a-Stat5b* double knock-in (DKI) mice measured by DNA binding of STAT5A and STAT5B before and after treatment with IL-2 for 1h<sup>1</sup>. **(b)** mRNA expression of *Lrrc8* genes from CD4<sup>+</sup> T cells activated for 3 days with anti-CD3+28 in the presence or not of 80 IU/ml IL-2 and measured by RT-qPCR. *Rip32* mRNA was used as housekeeping control. Data are the mean ± s.e.m. from at least 4 mice per treatment, done in triplicates and pooled from 2 independent experiments. **(c,d)** mRNA expression ratio of different *Lrrc8* genes to *Lrrc8a* in mouse WT and *Stat5a-Stat5b* DKI CD8<sup>+</sup> T cells before and after re-stimulation with IL-2 (in c) or IL-15 (in d) at the indicated time points; RNA-Seq data from<sup>1</sup>. Statistical analysis in (b) by two-tailed, unpaired Student's *t* test. Not significant (n.s.) *P* > 0.05 and \*\*\**P* < 0.001.

**Supplemental Figure 3**  
(associated with Figure 2a,b)

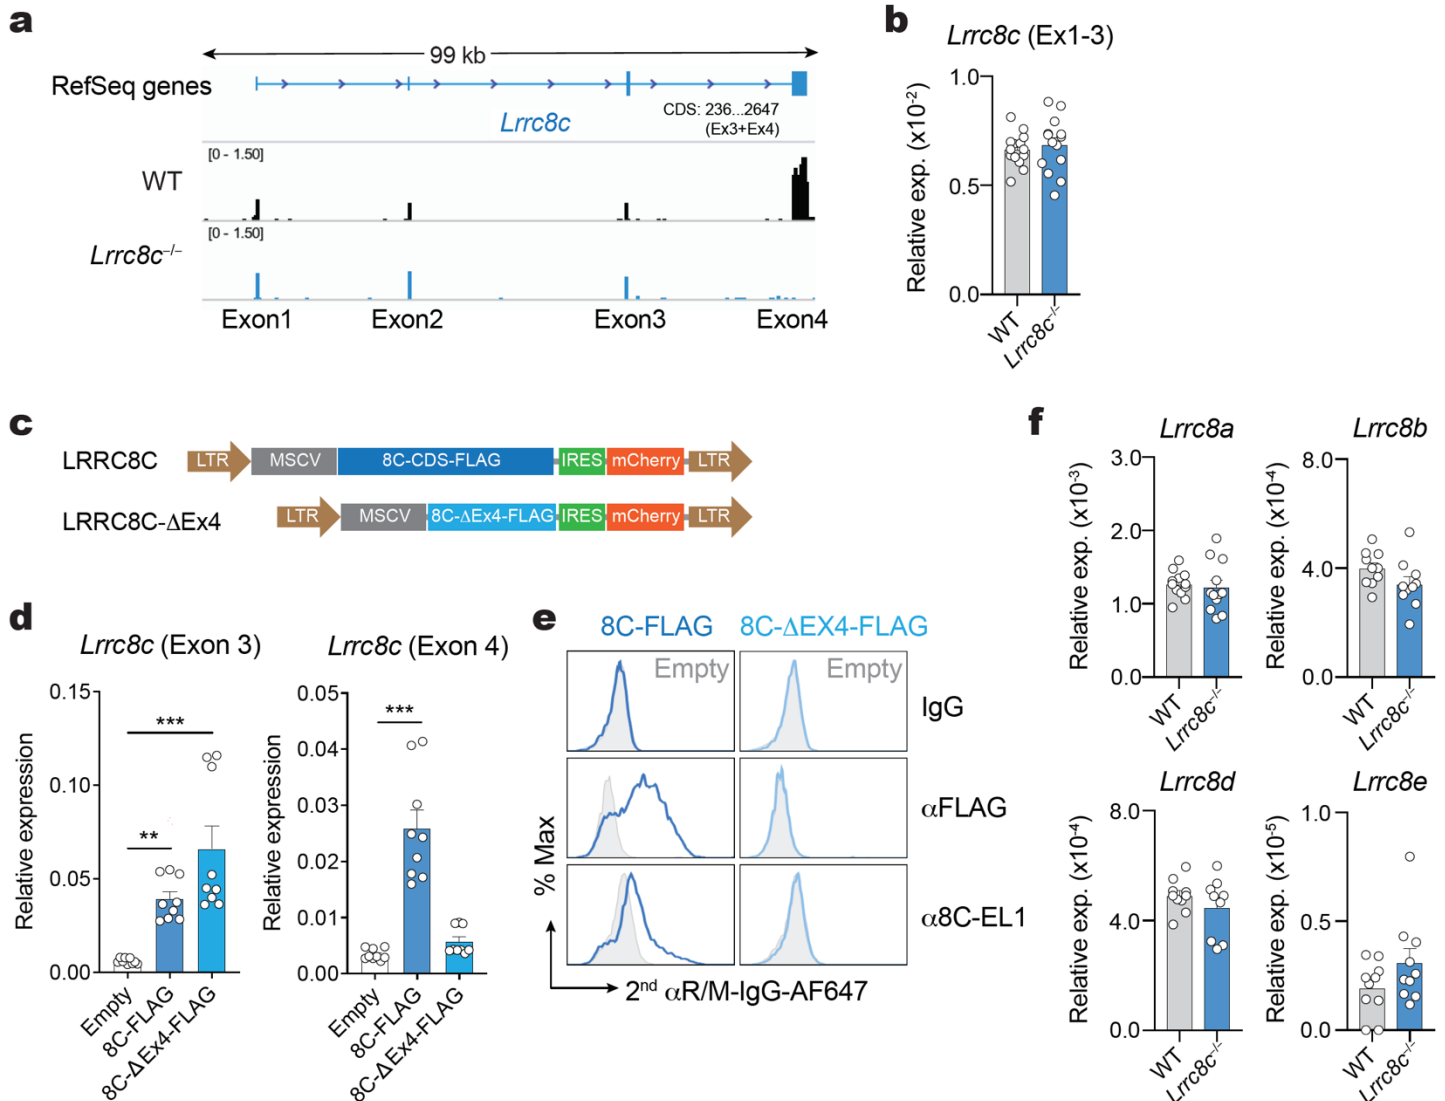

**Supplemental Figure 3.  $Lrrc8c^{-/-}$  CD4<sup>+</sup> T cells lack protein expression of LRRC8C-exon3 and have no compensatory mechanism from other  $Lrrc8$  genes.** (a) Alignment of experimental reads from RNA-Seq to the exons of the murine  $Lrrc8c$  gene in unstimulated WT and  $Lrrc8c^{-/-}$  CD4<sup>+</sup> T cells (representative from 3 mice per genotype). (b) Expression of  $Lrrc8c$  (exon 1-3) mRNA in unstimulated CD4<sup>+</sup> T cells isolated from WT and  $Lrrc8c^{-/-}$  mice and measured by RT-qPCR. Data are the mean  $\pm$  s.e.m. of 14 mice per genotype.  $Gapdh$  mRNA was used as housekeeping control. (c) MSCV retroviral vectors encoding murine  $Lrrc8c$  (WT coding sequence, CDS 236-2647) and mutant  $Lrrc8c$ - $\Delta$ Exon4 similar to  $Lrrc8c^{-/-}$  mice. Both WT and mutant  $Lrrc8c$ - $\Delta$ Exon4 constructs were FLAG-tagged at the C-terminus. (d,e) Relative mRNA (d) and protein expression (e) of LRRC8C in WT CD4<sup>+</sup> T cells 3 days after transduction with retroviral vectors shown in (c). In (d), mRNA expression for  $Lrrc8c$ -exon3 and -exon4 were measured by RT-qPCR using  $Gapdh$  mRNA as housekeeping control. Data are the mean  $\pm$  s.e.m. of 9 independent transductions per retroviral construct, and pooled from 3 independent experiments. In (e), protein expression was measured by flow cytometry and intracellular staining with a mouse anti-FLAG antibody or by using a rabbit anti-mouse LRRC8C antibody that recognizes the epitope AVISTTLPKPPKPSPTNPATV located between 74-94 aa in the first extracellular loop of LRRC8C, and 2<sup>nd</sup> antibodies conjugated with Alexa-Fluor 647 that recognized either mouse or rabbit IgG antibodies. (f) Relative mRNA expression of  $Lrrc8a$ ,  $Lrrc8b$ ,  $Lrrc8d$ , and  $Lrrc8e$  in unstimulated CD4<sup>+</sup> T cells isolated from WT and  $Lrrc8c^{-/-}$  mice and measured by RT-qPCR.  $Gapdh$  mRNA was used as housekeeping control. Data are the mean  $\pm$  s.e.m. of at least 9 mice per genotype. Statistical analysis in (d) by two-tailed, unpaired Student's  $t$  test. \*\* $P$ <0.01 and \*\*\* $P$ <0.001.

**Supplemental Figure 4**  
(associated with Figure 3)

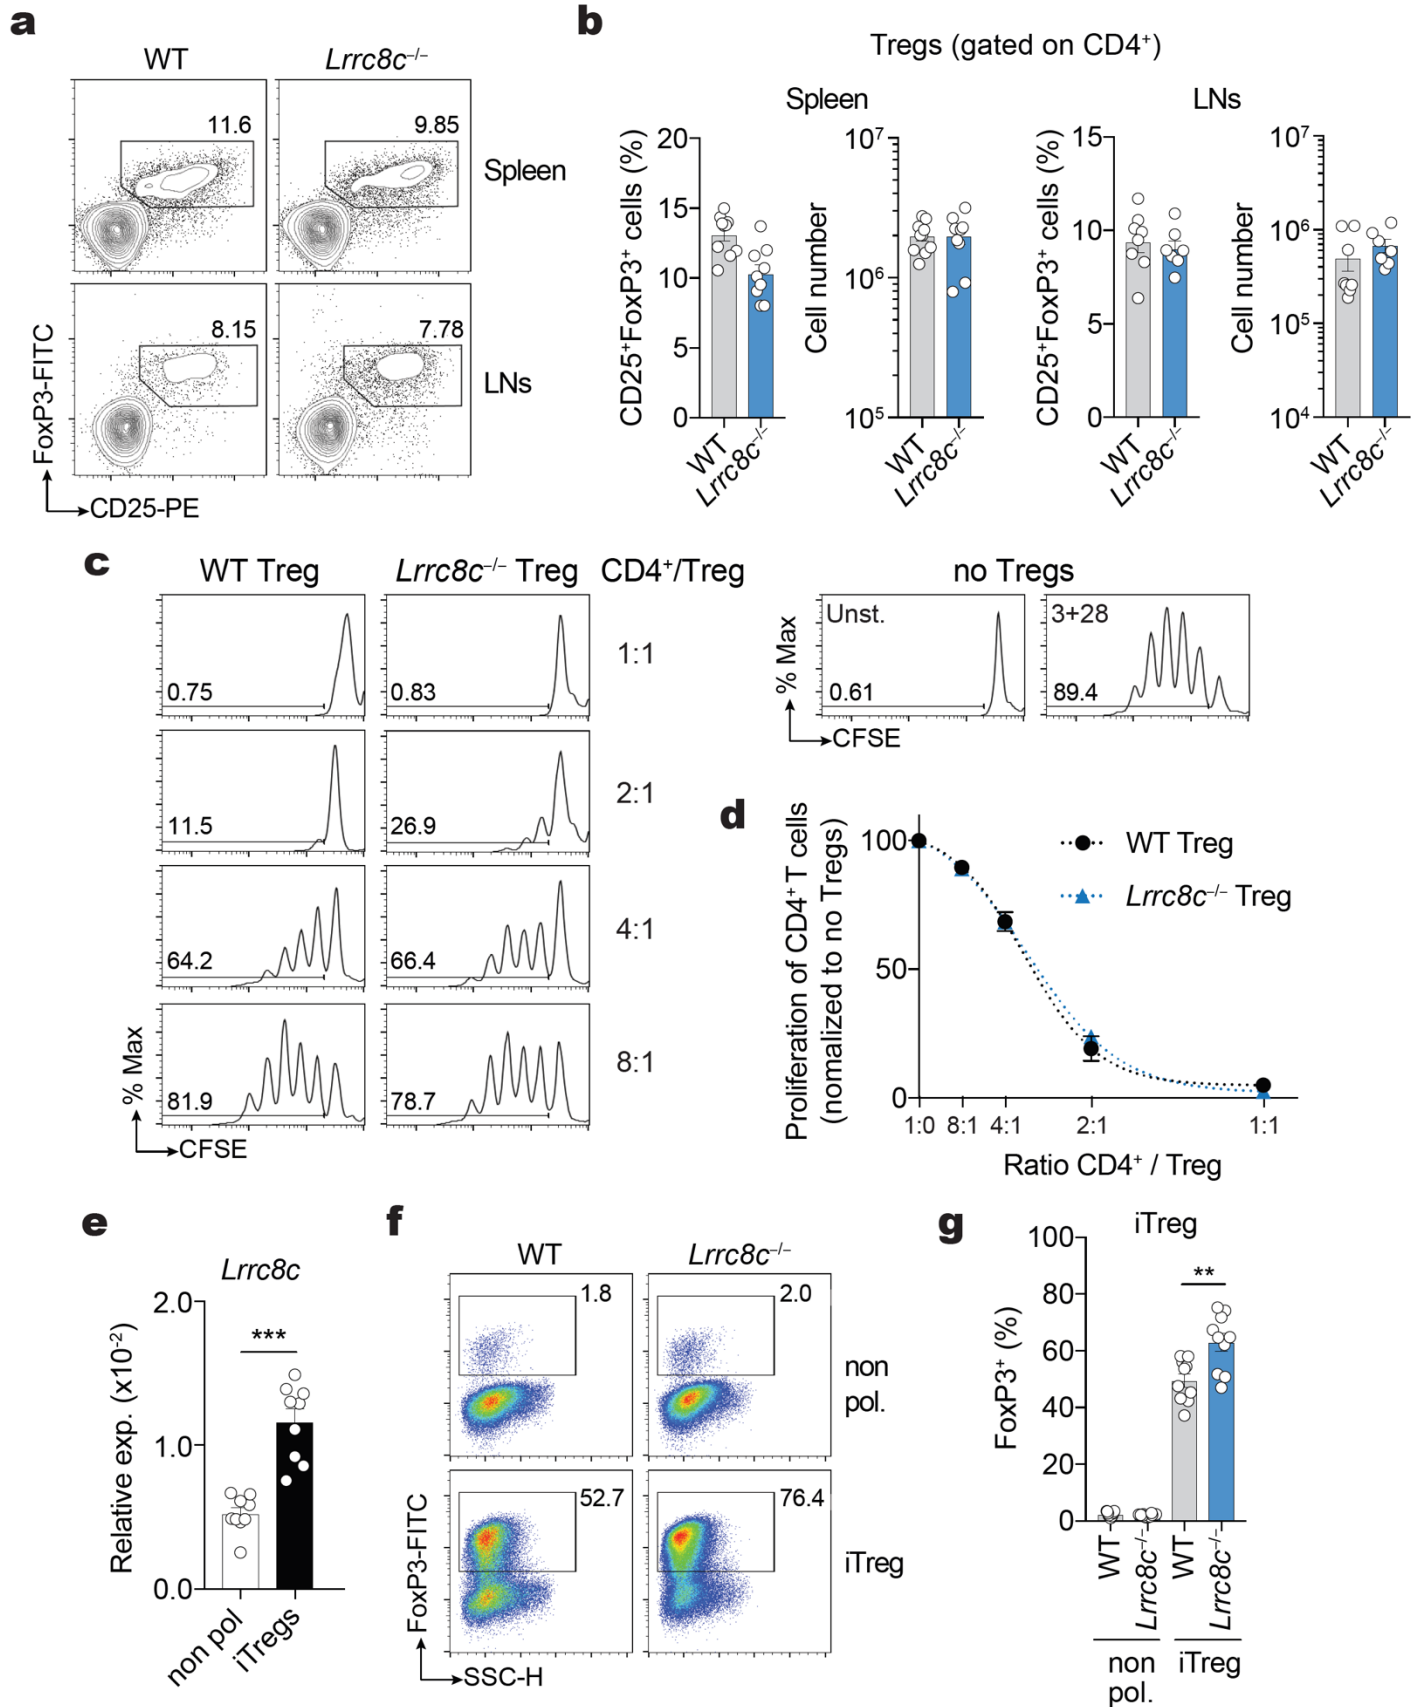

**Supplemental Figure 4. *Lrrc8c*<sup>-/-</sup> mice show normal development and function of Treg cells but increased iTreg differentiation in vitro.** (a,b) Representative flow cytometry plots (a) and quantification (b) of the proportion and total number of natural Tregs (nTregs, CD4<sup>+</sup>CD25<sup>+</sup>FoxP3<sup>+</sup>) in the spleen and lymph nodes from WT and *Lrrc8c*<sup>-/-</sup> mice. Data are the mean ± s.e.m. of 10 WT and 9 *Lrrc8c*<sup>-/-</sup> mice (spleen), and 8 WT and 7 *Lrrc8c*<sup>-/-</sup> mice (LNs). (c,d) Treg suppression assay of CD4<sup>+</sup> T cell proliferation by WT and *Lrrc8c*<sup>-/-</sup> Treg cells in vitro. WT CD4<sup>+</sup> T cells from CD45.1<sup>+</sup>-congenic mice were labeled with CFSE and co-cultured with WT or *Lrrc8c*<sup>-/-</sup> Tregs isolated from CD45.2<sup>+</sup>-congenic mice at different ratios, and stimulated with anti-CD3+28 dynabeads. Representative flow cytometry plots (c) and quantification (d) of CFSE dilution by CD4<sup>+</sup> T cells after 3 days of TCR stimulation. The proliferation of WT T cells in (d) was normalized to 100% in the absence of Treg cells in the culture conditions. Data are the mean ± s.e.m. of 2 experiments using 4 mice per genotype. (e-g) iTreg differentiation in vitro. (e) Relative mRNA expression of *Lrrc8c* in CD4<sup>+</sup> T cells activated with anti-CD3+28 (non pol) or in vitro differentiated into iTregs for 3 days and measured by RT-qPCR. *Gapdh* mRNA was used as housekeeping control. Data are the mean ± s.e.m. of 9 mice per genotype, pooled from 3 independent experiments. (f,g) Flow cytometry analysis showing (f) the expression and (g) quantification of FoxP3 in CD4<sup>+</sup> T cells from WT and *Lrrc8c*<sup>-/-</sup> mice 3 days after anti-CD3+28 stimulation or in vitro differentiated into iTregs. Data are the mean ± s.e.m. of 10 mice per genotype, pooled from 4 independent experiments. Statistical analysis in (e) and (g) by two-tailed, unpaired Student's *t* test. \*\**P*<0.01 and \*\*\**P*<0.001.

### Supplemental Figure 5

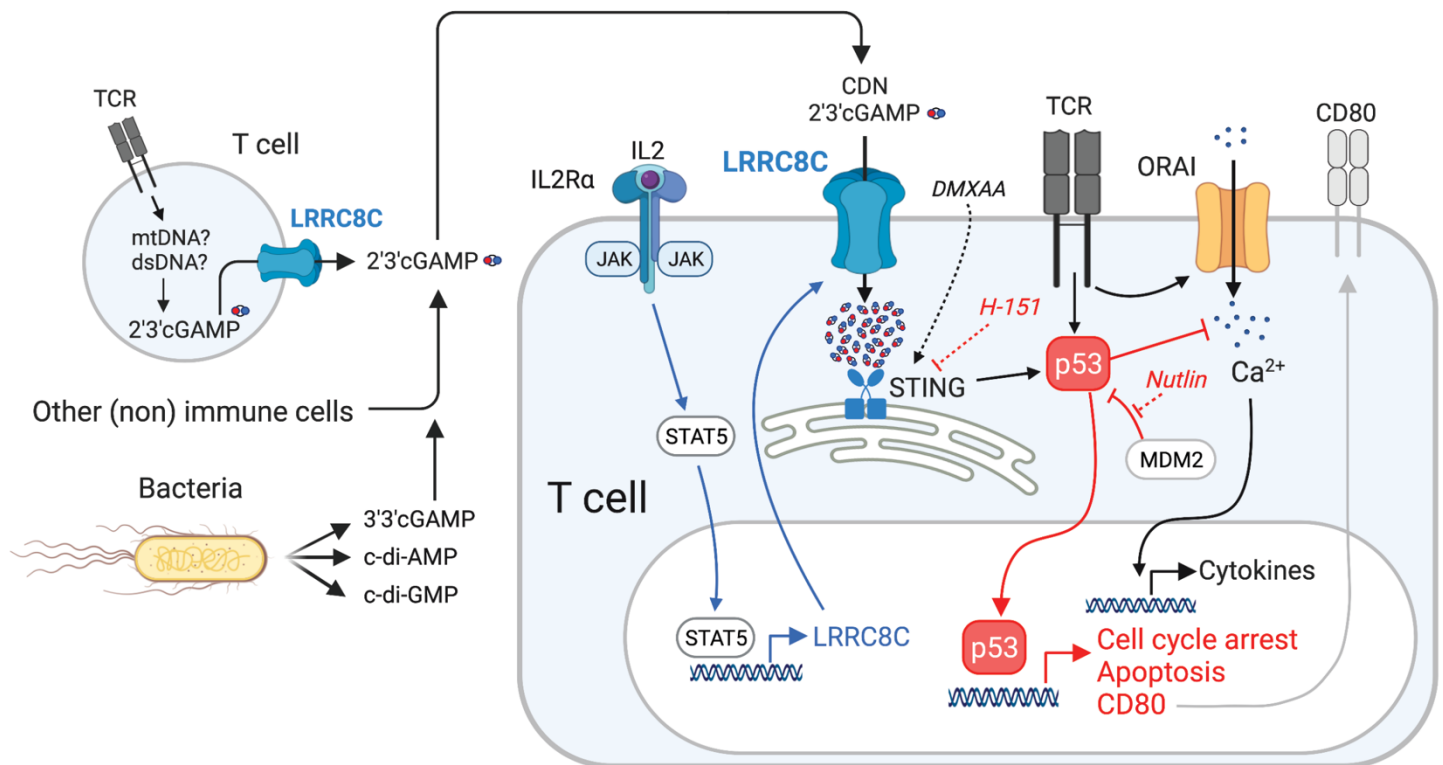

**Supplemental Figure 5. LRRC8C suppresses T cell function by mediating the influx of 2'3'cGAMP, STING and p53 activation and inhibition of SOCE.** LRRC8C channels located in the plasma membrane of T cells mediate the uptake of cyclic dinucleotides (CDN) including 2'3'cGAMP to activate STING. STING activation stabilizes the expression of p53 resulting in suppression of cell cycle progression and proliferation, increased apoptosis and CD80 expression. The STING-dependent activation of p53 also inhibits store-operated Ca<sup>2+</sup> entry (SOCE) and therefore cytokine production. Note that LRRC8C expression in T cells is controlled by IL-2 receptor and STAT5 signaling. Abbreviations: STING, stimulator of interferon genes; VRAC, volume-regulated anion channel. Created with BioRender.com.

**Supplemental Figure 6**  
(associated with Figure 6a-c)

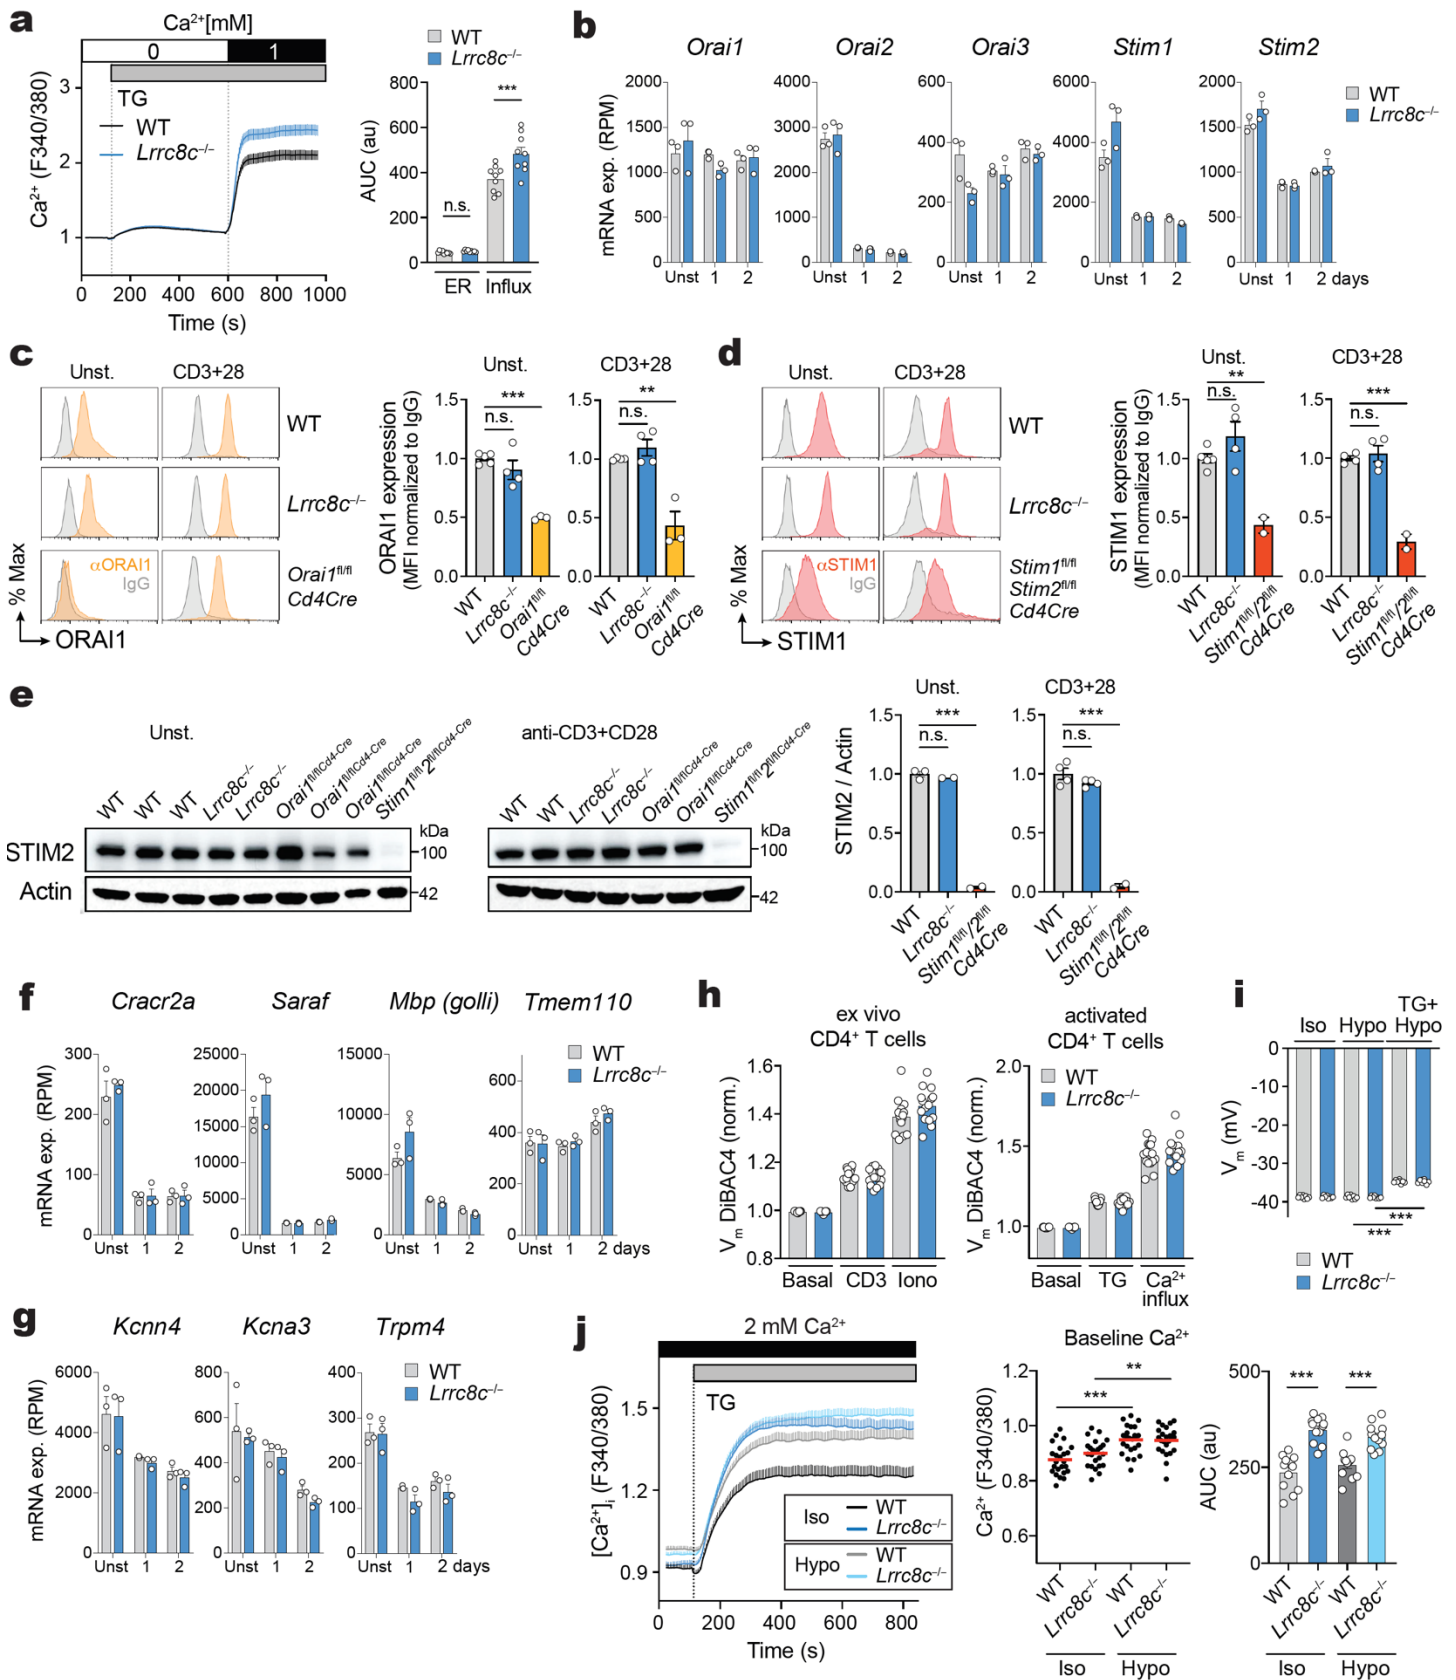

**Supplemental Figure 6. Increased  $\text{Ca}^{2+}$  influx in  $Lrrc8c^{-/-}$  T cells is not caused by increased expression of CRAC channel genes or altered membrane potential. (a)** Cytosolic  $\text{Ca}^{2+}$  signaling in naïve  $\text{CD4}^+$  T cells isolated from WT and  $Lrrc8c^{-/-}$  mice. T cells loaded with Fura-2 were stimulated with thapsigargin (TG) at 120s in  $\text{Ca}^{2+}$ -free buffer to assess endoplasmic reticulum (ER)- $\text{Ca}^{2+}$ , and  $\text{Ca}^{2+}$  influx by addition of extracellular  $\text{Ca}^{2+}$  at 600s. Averaged  $\text{Ca}^{2+}$  traces (left) and quantification of the area under the curve (AUC, right) in the regions indicated by the dotted lines (mean  $\pm$  s.e.m. of 9 mice per genotype, pooled from 3 independent experiments). **(b)** mRNA expression of CRAC channel genes in WT and  $Lrrc8c^{-/-}$  upon TCR stimulation at the indicated time points extracted from RNA-Seq data (shown data represent mean  $\pm$  s.e.m.,  $n = 3$  mice/genotype and treatment). **(c,d)** Protein expression of ORAI1 (c) and STIM1 (d) in WT and  $Lrrc8c^{-/-}$   $\text{CD4}^+$  T cells before and after 3 days of anti-CD3+28 stimulation measured by flow cytometry. Protein expression was measured by intracellular staining with rabbit polyclonal antibodies that recognize amino acids ELAEFARLQDQLDHRGD in the C-terminus of ORAI1 and DNGSIGEETDSSPGRKKFPLKIFKKPLKK in the C-terminus of STIM1. T cells from mice lacking ORAI1 ( $Orai1^{fl/fl}Cd4\text{-Cre}$ ) and STIM1 ( $Stim1^{fl/fl}Stim2^{fl/fl}Cd4\text{-Cre}$ ) were used as a control. Representative flow cytometry plots (left) and quantification (right) of protein expression measured as mean fluorescence intensity (MFI) after normalization to rabbit IgG control antibody. Data represent the mean  $\pm$  s.e.m. of 5 WT, 4  $Lrrc8c^{-/-}$ , 3  $Orai1^{fl/fl}Cd4\text{-Cre}$  and 2  $Stim1^{fl/fl}Stim2^{fl/fl}Cd4\text{-Cre}$  mice and pooled from 2 independent experiments. **(e)** Immunoblots of STIM2 in WT and  $Lrrc8c^{-/-}$   $\text{CD4}^+$  T cells before and after 3 days of anti-CD3+28 stimulation. T cells from mice lacking STIM2 ( $Stim1^{fl/fl}Stim2^{fl/fl}Cd4\text{-Cre}$ ) were used as a control. Actin was used as loading control. Representative blots (left) and quantification (right) of 3 WT, 2  $Lrrc8c^{-/-}$ , and 2  $Stim1^{fl/fl}Stim2^{fl/fl}Cd4\text{-Cre}$  mice for unstimulated conditions, and 4 WT, 4  $Lrrc8c^{-/-}$ , and 2  $Stim1^{fl/fl}Stim2^{fl/fl}Cd4\text{-Cre}$  mice for anti-CD3+28 stimulation, and were pooled from 2 independent experiments. **(f,g)** mRNA expression of regulators of CRAC channel function (f) and plasma membrane potential (g) in WT and  $Lrrc8c^{-/-}$  T cells at 1-2 days after TCR stimulation. Data represent the mean  $\pm$  s.e.m. of 3 mice per genotype. **(h)** Membrane potential ( $V_m$ ) in WT and  $Lrrc8c^{-/-}$   $\text{CD4}^+$  T cells measured with the  $V_m$  sensitive probe DiBAC4.  $V_m$  was measured in *ex vivo* isolated T cells (left) at baseline, upon activation of TCR by CD3-crosslinking, and during  $\text{Ca}^{2+}$  influx phase with ionomycin. In T cells stimulated with anti-CD3+28 for 3 days *in vitro* (right),  $V_m$  was measured at baseline, during store depletion with TG in  $\text{Ca}^{2+}$ -free Ringer buffer (ER-TG), and during  $\text{Ca}^{2+}$  influx phase upon the addition of extracellular  $\text{Ca}^{2+}$ .  $V_m$  measurements in WT and  $Lrrc8c^{-/-}$   $\text{CD4}^+$  T cells were normalized to basal fluorescence of DiBAC4 from WT T cells (mean  $\pm$  s.e.m. of 15 measurements from 5 mice per genotype, pooled from 2 independent experiments). **(i)**  $V_m$  in WT and  $Lrrc8c^{-/-}$   $\text{CD4}^+$  T cells activated with CD3+28 for 2 days measured by patch-clamping. Gigaohm seals were established in isotonic solution in voltage-clamp configuration and cells were subjected to hypotonic buffer and stimulated with TG for at least 5 min before recording  $V_m$  (mean  $\pm$  s.e.m. of 8 cells per genotype, pooled from 2 independent experiments). **(j)** Cytosolic  $\text{Ca}^{2+}$  signaling in WT and  $Lrrc8c^{-/-}$  T cells stimulated for 3 days with anti-CD3+28. T cells loaded with Fura-2 were stimulated with thapsigargin (TG) at 120s in isotonic ( $\sim 315$  mOsm) or hypotonic ( $\sim 215$  mOsm) buffers. Averaged  $\text{Ca}^{2+}$  traces (left) and quantification of the basal  $\text{Ca}^{2+}$  signals (middle), and AUC (right) in the regions indicated by the dotted lines (mean  $\pm$  s.e.m. of 12 traces from 4 mice per genotype, pooled from 2 independent experiments). Statistical analysis by two-tailed, unpaired Student's *t* test. Not significant (n.s.),  $P > 0.05$ ,  $**P < 0.01$  and  $***P < 0.001$ .



**Supplemental Figure 7**  
(associated with Figure 7)

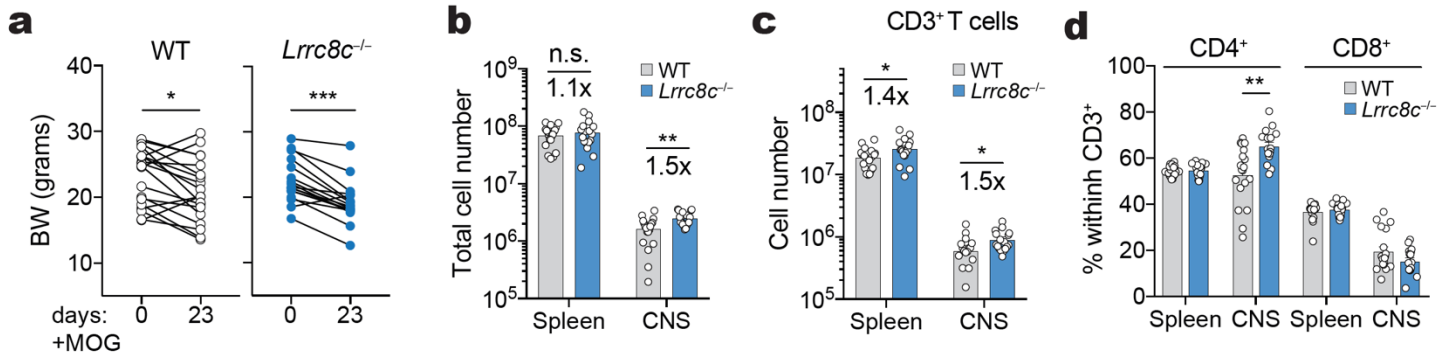

**Supplemental Figure 7. LRR8C deficiency exacerbates EAE.** (a) Body weight (BW) of WT and *Lrrc8c*<sup>-/-</sup> mice before and 23 days after EAE induction with MOG<sub>35-55</sub>. (b,c) Absolute numbers of cells (b) and CD3<sup>+</sup> T cells (c) isolated from the spleen and spinal cord (CNS) of WT and *Lrrc8c*<sup>-/-</sup> mice at day 23 after EAE induction and analyzed by flow cytometry. (d) Proportion of CD4<sup>+</sup> and CD8<sup>+</sup> T cell among CD3<sup>+</sup> T cells in the spleen and spinal cord of mice at day 23 after EAE induction and analyzed by flow cytometry. Data are the mean ± s.e.m. of 19 WT and 17 *Lrrc8c*<sup>-/-</sup> mice pooled from 3 independent experiments. Statistical analysis in (a) by two-tailed, paired *t* test, and in (b-d) by two-tailed, unpaired Student's *t* test. Not significant (n.s.), *P* > 0.05, \**P* < 0.05, \*\**P* < 0.01, and \*\*\**P* < 0.001.

**Supplemental Figure 8**  
(associated with Figure 8)

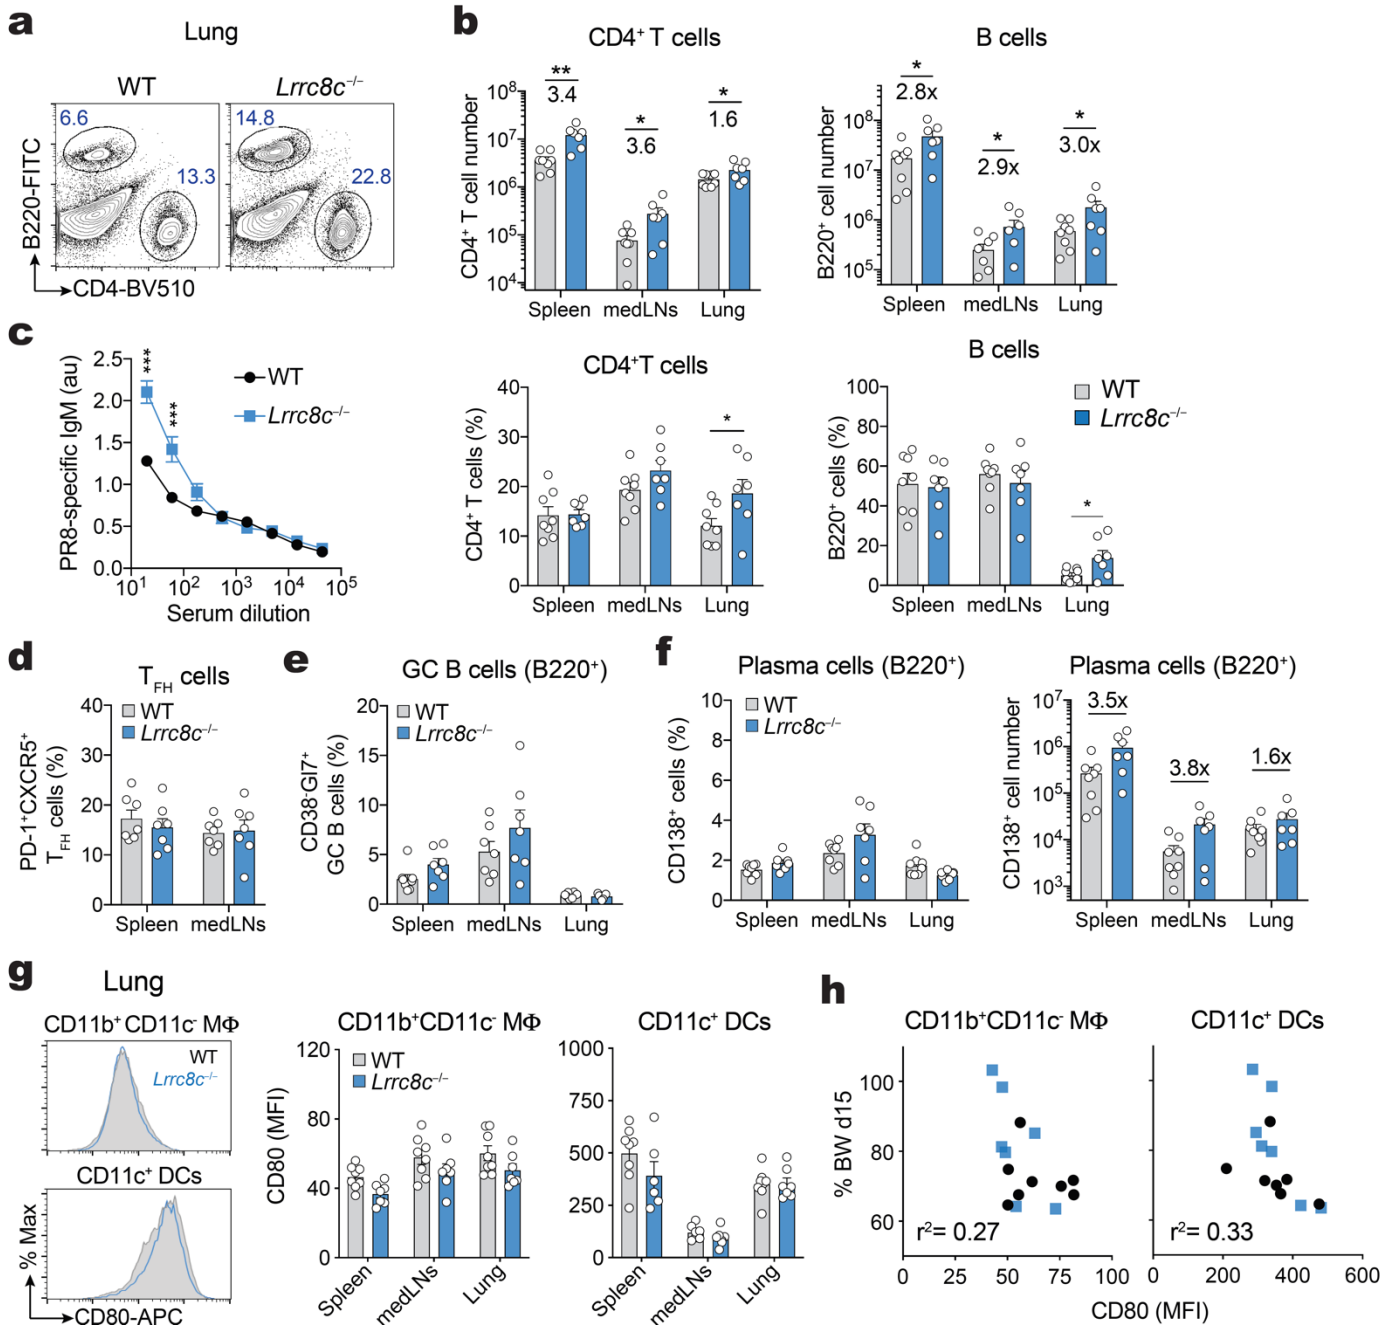

**Supplemental Figure 8. LRR8C deficiency enhances immunity against IAV infection.** (a,b) Flow cytometry analysis of CD4<sup>+</sup> T cells and B220<sup>+</sup> B cells of WT and *Lrrc8c*<sup>-/-</sup> mice 15 days after infection with the PR8 strain (H1N1) of influenza A virus (IAV). (a) Representative contour plots of cells in the lungs. (b) Absolute number (top) and proportion (bottom) of CD4<sup>+</sup> T cells and B220<sup>+</sup> B cells in the spleen, mediastinal lymph nodes (medLNs) and lungs. (c) anti-PR8 IgM antibodies in the sera of WT and *Lrrc8c*<sup>-/-</sup> mice at day 15 post infection (p.i.) detected by ELISA. (d-f) Proportion of CD4<sup>+</sup>PD-1<sup>+</sup>CXCR5<sup>+</sup> T<sub>FH</sub> cells (d), germinal center (GC) B cells (e), and proportion and total number of plasma cells (f) in the spleen, medLNs and lung of mice 15 days p.i. with IAV. (g) CD80 surface expression on myeloid cells from WT and *Lrrc8c*<sup>-/-</sup> mice infected with IAV. Representative histograms (left) and quantification (right) of CD80 expression (MFI) at the surface of CD11b<sup>+</sup>CD11c<sup>-</sup> macrophages (MΦ) and CD11c<sup>+</sup> dendritic cells (DCs) isolated from the spleen, medLNs and lungs of mice 15 days p.i. with IAV. (h) Correlation of body weight (BW) and CD80 expression on myeloid cells isolated from the lungs of mice 15 days after IAV infection. Data represent the mean ± s.e.m. of 8 WT and 7 *Lrrc8c*<sup>-/-</sup> mice pooled from 2 independent experiments. Statistical analysis by two-tailed, unpaired Student's *t* test. \**P*<0.05, \*\**P*<0.01, and \*\*\**P*<0.001.

**Supplemental Table 1. List of ion channels, transporters and regulatory proteins (ICTs).** ICTs are grouped by functional category (channels, transporters, regulatory proteins, enzymes) and listed alphabetically within each category. ICT indicated in **bold** are highly expressed in CD4<sup>+</sup> T cells (compare **Fig.1b**). \* The transporter category also includes ion pumps, exchangers, co-transporters and antiporters.

| Mm Gene     | Mm Full Name                                                               | Mm Gene ID    | Hs Gene         | Hs Gene ID      | Functional category* |
|-------------|----------------------------------------------------------------------------|---------------|-----------------|-----------------|----------------------|
| Abcc8       | ATP-binding cassette, sub-family C (CFTR/MRP), member 8                    | 20927         | ABCC8           | 6833            | Channel              |
| Abcc9       | ATP-binding cassette, sub-family C (CFTR/MRP), member 9                    | 20928         | ABCC9           | 10060           | Channel              |
| Ano1        | Anoctamin 1, Ca <sup>2+</sup> activated chloride channel                   | 101772        | ANO1            | 55107           | Channel              |
| Ano10       | Anoctamin 10                                                               | 102566        | ANO10           | 55129           | Channel              |
| Ano2        | Anoctamin 2                                                                | 243634        | ANO2            | 57101           | Channel              |
| Ano3        | Anoctamin 3                                                                | 228432        | ANO3            | 63982           | Channel              |
| Ano4        | Anoctamin 4                                                                | 320091        | ANO4            | 121601          | Channel              |
| Ano5        | Anoctamin 5                                                                | 233246        | ANO5            | 203859          | Channel              |
| <b>Ano6</b> | <b>Anoctamin 6</b>                                                         | <b>105722</b> | <b>ANO6</b>     | <b>196527</b>   | <b>Channel</b>       |
| Ano7        | Anoctamin 7                                                                | 404545        | ANO7            | 50636           | Channel              |
| Ano8        | Anoctamin 8                                                                | 382014        | ANO8            | 57719           | Channel              |
| <b>Ano9</b> | <b>Anoctamin 9</b>                                                         | <b>71345</b>  | <b>ANO9</b>     | <b>338440</b>   | <b>Channel</b>       |
| Aqp1        | Aquaporin 1                                                                | 11826         | AQP1            | 358             | Channel              |
| Aqp11       | Aquaporin 11                                                               | 66333         | AQP11           | 282679          | Channel              |
| Aqp12       | Aquaporin 12                                                               | 208760        | AQP12A   AQP12B | 375318   653437 | Channel              |
| Aqp2        | Aquaporin 2                                                                | 11827         | AQP2            | 359             | Channel              |
| <b>Aqp3</b> | <b>Aquaporin 3</b>                                                         | <b>11828</b>  | <b>AQP3</b>     | <b>360</b>      | <b>Channel</b>       |
| Aqp4        | Aquaporin 4                                                                | 11829         | AQP4            | 361             | Channel              |
| Aqp5        | Aquaporin 5                                                                | 11830         | AQP5            | 362             | Channel              |
| Aqp6        | Aquaporin 6                                                                | 11831         | AQP6            | 363             | Channel              |
| Aqp7        | Aquaporin 7                                                                | 11832         | AQP7            | 364             | Channel              |
| Aqp8        | Aquaporin 8                                                                | 11833         | AQP8            | 343             | Channel              |
| Aqp9        | Aquaporin 9                                                                | 64008         | AQP9            | 366             | Channel              |
| Asic1       | Acid-sensing (proton-gated) ion channel 1                                  | 11419         | ASIC1           | 41              | Channel              |
| Asic2       | Acid-sensing (proton-gated) ion channel 2                                  | 11418         | ASIC2           | 40              | Channel              |
| Asic3       | Acid-sensing (proton-gated) ion channel 3                                  | 171209        | ASIC3           | 9311            | Channel              |
| Asic4       | Acid-sensing (proton-gated) ion channel family member 4                    | 241118        | ASIC4           | 55515           | Channel              |
| Asic5       | Acid-sensing (proton-gated) ion channel family member 5                    | 58170         | ASIC5           | 51802           | Channel              |
| Best1       | Bestrophin 1                                                               | 24115         | BEST1           | 7439            | Channel              |
| Best2       | Bestrophin 2                                                               | 212989        | BEST2           | 54831           | Channel              |
| Best3       | Bestrophin 3                                                               | 382427        | BEST3           | 144453          | Channel              |
| Best4ps     | Bestrophin 4                                                               | 230664        | BEST4           | 266675          | Channel              |
| Bsnd        | Barttin CLCNK type accessory $\beta$ subunit                               | 140475        | BSND            | 7809            | Channel              |
| Cacna1a     | Ca <sup>2+</sup> channel, voltage-dependent, P/Q type, $\alpha$ 1A subunit | 12286         | CACNA1A         | 773             | Channel              |
| Cacna1b     | Ca <sup>2+</sup> channel, voltage-dependent, N type, $\alpha$ 1B subunit   | 12287         | CACNA1B         | 774             | Channel              |
| Cacna1c     | Ca <sup>2+</sup> channel, voltage-dependent, L type, $\alpha$ 1C subunit   | 12288         | CACNA1C         | 775             | Channel              |
| Cacna1d     | Ca <sup>2+</sup> channel, voltage-dependent, L type, $\alpha$ 1D subunit   | 12289         | CACNA1D         | 776             | Channel              |
| Cacna1e     | Ca <sup>2+</sup> channel, voltage-dependent, R type, $\alpha$ 1E subunit   | 12290         | CACNA1E         | 777             | Channel              |
| Cacna1f     | Ca <sup>2+</sup> channel, voltage-dependent, $\alpha$ 1F subunit           | 54652         | CACNA1F         | 778             | Channel              |
| Cacna1g     | Ca <sup>2+</sup> channel, voltage-dependent, T type, $\alpha$ 1G subunit   | 12291         | CACNA1G         | 8913            | Channel              |
| Cacna1h     | Ca <sup>2+</sup> channel, voltage-dependent, T type, $\alpha$ 1H subunit   | 58226         | CACNA1H         | 8912            | Channel              |
| Cacna1i     | Ca <sup>2+</sup> channel, voltage-dependent, $\alpha$ 1I subunit           | 239556        | CACNA1I         | 8911            | Channel              |

| Mm Gene       | Mm Full Name                                                       | Mm Gene ID    | Hs Gene       | Hs Gene ID    | Functional category* |
|---------------|--------------------------------------------------------------------|---------------|---------------|---------------|----------------------|
| Cacna1s       | Ca2+ channel, voltage-dependent, L type, $\alpha$ 1S subunit       | 12292         | CACNA1S       | 779           | Channel              |
| Cacna2d1      | Ca2+ channel, voltage-dependent, $\alpha$ 2/ $\delta$ subunit 1    | 12293         | CACNA2D1      | 781           | Channel              |
| Cacna2d2      | Ca2+ channel, voltage-dependent, $\alpha$ 2/ $\delta$ subunit 2    | 56808         | CACNA2D2      | 9254          | Channel              |
| Cacna2d3      | Ca2+ channel, voltage-dependent, $\alpha$ 2/ $\delta$ subunit 3    | 12294         | CACNA2D3      | 55799         | Channel              |
| Cacna2d4      | Ca2+ channel, voltage-dependent, $\alpha$ 2/ $\delta$ subunit 4    | 319734        | CACNA2D4      | 93589         | Channel              |
| Cacnb1        | Ca2+ channel, voltage-dependent, $\beta$ 1 subunit                 | 12295         | CACNB1        | 782           | Channel              |
| Cacnb2        | Ca2+ channel, voltage-dependent, $\beta$ 2 subunit                 | 12296         | CACNB2        | 783           | Channel              |
| Cacnb3        | Ca2+ channel, voltage-dependent, $\beta$ 3 subunit                 | 12297         | CACNB3        | 784           | Channel              |
| Cacnb4        | Ca2+ channel, voltage-dependent, $\beta$ 4 subunit                 | 12298         | CACNB4        | 785           | Channel              |
| Cacng1        | Ca2+ channel, voltage-dependent, $\gamma$ subunit 1                | 12299         | CACNG1        | 786           | Channel              |
| Cacng2        | Ca2+ channel, voltage-dependent, $\gamma$ subunit 2                | 12300         | CACNG2        | 10369         | Channel              |
| Cacng3        | Ca2+ channel, voltage-dependent, $\gamma$ subunit 3                | 54376         | CACNG3        | 10368         | Channel              |
| Cacng4        | Ca2+ channel, voltage-dependent, $\gamma$ subunit 4                | 54377         | CACNG4        | 27092         | Channel              |
| Cacng5        | Ca2+ channel, voltage-dependent, $\gamma$ subunit 5                | 140723        | CACNG5        | 27091         | Channel              |
| Cacng6        | Ca2+ channel, voltage-dependent, $\gamma$ subunit 6                | 54378         | CACNG6        | 59285         | Channel              |
| Cacng7        | Ca2+ channel, voltage-dependent, $\gamma$ subunit 7                | 81904         | CACNG7        | 59284         | Channel              |
| Cacng8        | Ca2+ channel, voltage-dependent, $\gamma$ subunit 8                | 81905         | CACNG8        | 59283         | Channel              |
| Calhm1        | Ca2+ homeostasis modulator 1                                       | 546729        | CALHM1        | 255022        | Channel              |
| <b>Calhm2</b> | <b>Ca2+ homeostasis modulator family member 2</b>                  | <b>72691</b>  | <b>CALHM2</b> | <b>51063</b>  | <b>Channel</b>       |
| Calhm3        | Ca2+ homeostasis modulator family member 3                         | 240669        | CALHM3        | 119395        | Channel              |
| Calhm4        | Ca2+ homeostasis modulator family member 4                         | 270711        | CALHM4        | 221301        | Channel              |
| Calhm5        | Ca2+ homeostasis modulator family member 5                         | 103511        | CALHM5        | 254228        | Channel              |
| <b>Calhm6</b> | <b>Ca2+ homeostasis modulator family member 6</b>                  | <b>215900</b> | <b>CALHM6</b> | <b>441168</b> | <b>Channel</b>       |
| Catsper1      | Cation channel, sperm associated 1                                 | 225865        | CATSPER1      | 117144        | Channel              |
| Catsper2      | Cation channel, sperm associated 2                                 | 212670        | CATSPER2      | 117155        | Channel              |
| Catsper3      | Cation channel, sperm associated 3                                 | 76856         | CATSPER3      | 347732        | Channel              |
| Catsper4      | Cation channel, sperm associated 4                                 | 329954        | CATSPER4      | 378807        | Channel              |
| Catsperb      | Cation channel sperm associated auxiliary subunit $\beta$          | 271036        | CATSPERB      | 79820         | Channel              |
| Catsperd      | Cation channel sperm associated auxiliary subunit $\delta$         | 106757        | CATSPERD      | 257062        | Channel              |
| Catsperg1     | Cation channel sperm associated auxiliary subunit $\gamma$ 1       | 320225        | CATSPERG      | 57828         | Channel              |
| Cct8l1        | Chaperonin containing TCP1, subunit 8 ( $\theta$ )-like 1          | 242891        | CCT8L2        | 150160        | Channel              |
| Cftr          | Cystic fibrosis transmembrane conductance regulator                | 12638         | CFTR          | 1080          | Channel              |
| Chrna1        | Cholinergic receptor, nicotinic, $\alpha$ polypeptide 1 (muscle)   | 11435         | CHRNA1        | 1134          | Channel              |
| Chrna10       | Cholinergic receptor, nicotinic, $\alpha$ polypeptide 10           | 504186        | CHRNA10       | 57053         | Channel              |
| Chrna2        | Cholinergic receptor, nicotinic, $\alpha$ polypeptide 2 (neuronal) | 110902        | CHRNA2        | 1135          | Channel              |
| Chrna3        | Cholinergic receptor, nicotinic, $\alpha$ polypeptide 3            | 110834        | CHRNA3        | 1136          | Channel              |
| Chrna4        | Cholinergic receptor, nicotinic, $\alpha$ polypeptide 4            | 11438         | CHRNA4        | 1137          | Channel              |
| Chrna5        | Cholinergic receptor, nicotinic, $\alpha$ polypeptide 5            | 110835        | CHRNA5        | 1138          | Channel              |
| Chrna6        | Cholinergic receptor, nicotinic, $\alpha$ polypeptide 6            | 11440         | CHRNA6        | 8973          | Channel              |
| Chrna7        | Cholinergic receptor, nicotinic, $\alpha$ polypeptide 7            | 11441         | CHRNA7        | 1139          | Channel              |
| Chrna9        | Cholinergic receptor, nicotinic, $\alpha$ polypeptide 9            | 231252        | CHRNA9        | 55584         | Channel              |
| Chrn1         | Cholinergic receptor, nicotinic, $\beta$ polypeptide 1 (muscle)    | 11443         | CHRN1         | 1140          | Channel              |
| Chrn2         | Cholinergic receptor, nicotinic, $\beta$ polypeptide 2 (neuronal)  | 11444         | CHRN2         | 1141          | Channel              |
| Chrn3         | Cholinergic receptor, nicotinic, $\beta$ polypeptide 3             | 108043        | CHRN3         | 1142          | Channel              |
| Chrn4         | Cholinergic receptor, nicotinic, $\beta$ polypeptide 4             | 108015        | CHRN4         | 1143          | Channel              |
| Chrnd         | Cholinergic receptor, nicotinic, $\delta$ polypeptide              | 11447         | CHRND         | 1144          | Channel              |
| Chrne         | Cholinergic receptor, nicotinic, $\epsilon$ polypeptide            | 11448         | CHRNE         | 1145          | Channel              |
| Chrng         | Cholinergic receptor, nicotinic, $\gamma$ polypeptide              | 11449         | CHRNG         | 1146          | Channel              |
| Clca1         | Chloride channel accessory 1                                       | 23844         | CLCA1         | 1179          | Channel              |

| Mm Gene       | Mm Full Name                                                      | Mm Gene ID    | Hs Gene       | Hs Gene ID  | Functional category* |
|---------------|-------------------------------------------------------------------|---------------|---------------|-------------|----------------------|
| Clca2         | Chloride channel accessory 2                                      | 229933        | CLCA2         | 9635        | Channel              |
| Clca4a        | Chloride channel accessory 4A                                     | 99663         | CLCA4         | 22802       | Channel              |
| Clcc1         | Chloride channel CLIC-like 1                                      | 229725        | CLCC1         | 23155       | Channel              |
| Clcn1         | Chloride channel, voltage-sensitive 1                             | 12723         | CLCN1         | 1180        | Channel              |
| Clcn2         | Chloride channel, voltage-sensitive 2                             | 12724         | CLCN2         | 1181        | Channel              |
| <b>Clcn3</b>  | <b>Chloride channel, voltage-sensitive 3</b>                      | <b>12725</b>  | <b>CLCN3</b>  | <b>1182</b> | <b>Channel</b>       |
| Clcn4         | Chloride channel, voltage-sensitive 4                             | 12727         | CLCN4         | 1183        | Channel              |
| Clcn5         | Chloride channel, voltage-sensitive 5                             | 12728         | CLCN5         | 1184        | Channel              |
| Clcn6         | Chloride channel, voltage-sensitive 6                             | 26372         | CLCN6         | 1185        | Channel              |
| <b>Clcn7</b>  | <b>Chloride channel, voltage-sensitive 7</b>                      | <b>26373</b>  | <b>CLCN7</b>  | <b>1186</b> | <b>Channel</b>       |
| Clcnka        | Chloride channel, voltage-sensitive Ka                            | 12733         | CLCNKB        | 1188        | Channel              |
| Clcnkb        | Chloride channel, voltage-sensitive Kb                            | 56365         | CLCNKA        | 1187        | Channel              |
| <b>Clc1</b>   | <b>Chloride intracellular channel 1</b>                           | <b>114584</b> | <b>CLIC1</b>  | <b>1192</b> | <b>Channel</b>       |
| Clc3          | Chloride intracellular channel 3                                  | 69454         | CLIC3         | 9022        | Channel              |
| Clc4          | Chloride intracellular channel 4 (mitochondrial)                  | 29876         | CLIC4         | 25932       | Channel              |
| Clc5          | Chloride intracellular channel 5                                  | 224796        | CLIC5         | 53405       | Channel              |
| Clc6          | Chloride intracellular channel 6                                  | 209195        | CLIC6         | 54102       | Channel              |
| <b>Clns1a</b> | <b>Chloride channel, nucleotide-sensitive, 1A</b>                 | <b>12729</b>  | <b>CLNS1A</b> | <b>1207</b> | <b>Channel</b>       |
| Cnga1         | Cyclic nucleotide gated channel $\alpha$ 1                        | 12788         | CNGA1         | 1259        | Channel              |
| Cnga2         | Cyclic nucleotide gated channel $\alpha$ 2                        | 12789         | CNGA2         | 1260        | Channel              |
| Cnga3         | Cyclic nucleotide gated channel $\alpha$ 3                        | 12790         | CNGA3         | 1261        | Channel              |
| Cnga4         | Cyclic nucleotide gated channel $\alpha$ 4                        | 233649        | CNGA4         | 1262        | Channel              |
| Cngb1         | Cyclic nucleotide gated channel $\beta$ 1                         | 333329        | CNGB1         | 1258        | Channel              |
| Cngb3         | Cyclic nucleotide gated channel $\beta$ 3                         | 30952         | CNGB3         | 54714       | Channel              |
| Cnih2         | Cornichon family AMPA receptor auxiliary protein 2                | 12794         | CNIH2         | 254263      | Channel              |
| Cnih3         | Cornichon family AMPA receptor auxiliary protein 3                | 72978         | CNIH3         | 149111      | Channel              |
| Cybb          | Cytochrome b-245, $\beta$ polypeptide                             | 13058         | CYBB          | 1536        | Channel              |
| Gabra1        | $\gamma$ -aminobutyric acid (GABA) A receptor, subunit $\alpha$ 1 | 14394         | GABRA1        | 2554        | Channel              |
| Gabra2        | $\gamma$ -aminobutyric acid (GABA) A receptor, subunit $\alpha$ 2 | 14395         | GABRA2        | 2555        | Channel              |
| Gabra3        | $\gamma$ -aminobutyric acid (GABA) A receptor, subunit $\alpha$ 3 | 14396         | GABRA3        | 2556        | Channel              |
| Gabra4        | $\gamma$ -aminobutyric acid (GABA) A receptor, subunit $\alpha$ 4 | 14397         | GABRA4        | 2557        | Channel              |
| Gabra5        | $\gamma$ -aminobutyric acid (GABA) A receptor, subunit $\alpha$ 5 | 110886        | GABRA5        | 2558        | Channel              |
| Gabra6        | $\gamma$ -aminobutyric acid (GABA) A receptor, subunit $\alpha$ 6 | 14399         | GABRA6        | 2559        | Channel              |
| Gabrb1        | $\gamma$ -aminobutyric acid (GABA) A receptor, subunit $\beta$ 1  | 14400         | GABRB1        | 2560        | Channel              |
| Gabrb2        | $\gamma$ -aminobutyric acid (GABA) A receptor, subunit $\beta$ 2  | 14401         | GABRB2        | 2561        | Channel              |
| Gabrb3        | $\gamma$ -aminobutyric acid (GABA) A receptor, subunit $\beta$ 3  | 14402         | GABRB3        | 2562        | Channel              |
| Gabrd         | $\gamma$ -aminobutyric acid (GABA) A receptor, subunit $\delta$   | 14403         | GABRD         | 2563        | Channel              |
| Gabre         | $\gamma$ -aminobutyric acid (GABA) A receptor, subunit $\epsilon$ | 14404         | GABRE         | 2564        | Channel              |
| Gabrg1        | $\gamma$ -aminobutyric acid (GABA) A receptor, subunit $\gamma$ 1 | 14405         | GABRG1        | 2565        | Channel              |
| Gabrg2        | $\gamma$ -aminobutyric acid (GABA) A receptor, subunit $\gamma$ 2 | 14406         | GABRG2        | 2566        | Channel              |
| Gabrg3        | $\gamma$ -aminobutyric acid (GABA) A receptor, subunit $\gamma$ 3 | 14407         | GABRG3        | 2567        | Channel              |
| Gabrp         | $\gamma$ -aminobutyric acid (GABA) A receptor, pi                 | 216643        | GABRP         | 2568        | Channel              |
| Gabrq         | $\gamma$ -aminobutyric acid (GABA) A receptor, subunit $\theta$   | 57249         | GABRQ         | 55879       | Channel              |
| Gabrr1        | $\gamma$ -aminobutyric acid (GABA) C receptor, subunit $\rho$ 1   | 14408         | GABRR1        | 2569        | Channel              |
| Gabrr2        | $\gamma$ -aminobutyric acid (GABA) C receptor, subunit $\rho$ 2   | 14409         | GABRR2        | 2570        | Channel              |
| Gabrr3        | $\gamma$ -aminobutyric acid (GABA) receptor, $\rho$ 3             | 328699        | GABRR3        | 200959      | Channel              |
| Gja1          | Gap junction protein, $\alpha$ 1                                  | 14609         | GJA1          | 2697        | Channel              |
| Gja10         | Gap junction protein, $\alpha$ 10                                 | 14610         | GJA10         | 84694       | Channel              |
| Gja3          | Gap junction protein, $\alpha$ 3                                  | 14611         | GJA3          | 2700        | Channel              |

| Mm Gene      | Mm Full Name                                                                 | Mm Gene ID   | Hs Gene         | Hs Gene ID     | Functional category* |
|--------------|------------------------------------------------------------------------------|--------------|-----------------|----------------|----------------------|
| Gja4         | Gap junction protein, $\alpha$ 4                                             | 14612        | GJA4            | 2701           | Channel              |
| Gja5         | Gap junction protein, $\alpha$ 5                                             | 14613        | GJA5            | 2702           | Channel              |
| Gja8         | Gap junction protein, $\alpha$ 8                                             | 14616        | GJA8            | 2703           | Channel              |
| Gjb1         | Gap junction protein, $\beta$ 1                                              | 14618        | GJB1            | 2705           | Channel              |
| Gjb2         | Gap junction protein, $\beta$ 2                                              | 14619        | GJB2            | 2706           | Channel              |
| Gjb3         | Gap junction protein, $\beta$ 3                                              | 14620        | GJB3            | 2707           | Channel              |
| Gjb4         | Gap junction protein, $\beta$ 4                                              | 14621        | GJB4            | 127534         | Channel              |
| Gjb5         | Gap junction protein, $\beta$ 5                                              | 14622        | GJB5            | 2709           | Channel              |
| Gjb6         | Gap junction protein, $\beta$ 6                                              | 14623        | GJB6            | 10804          | Channel              |
| Gjc1         | Gap junction protein, $\gamma$ 1                                             | 14615        | GJC1            | 10052          | Channel              |
| Gjc2         | Gap junction protein, $\gamma$ 2                                             | 118454       | GJC2            | 57165          | Channel              |
| Gjc3         | Gap junction protein, $\gamma$ 3                                             | 118446       | GJC3            | 349149         | Channel              |
| Gjd2         | Gap junction protein, $\delta$ 2                                             | 14617        | GJD2            | 57369          | Channel              |
| Gjd3         | Gap junction protein, $\delta$ 3                                             | 353155       | GJD3            | 125111         | Channel              |
| Gjd4         | Gap junction protein, $\delta$ 4                                             | 225152       | GJD4            | 219770         | Channel              |
| Gje1         | Gap junction protein, $\epsilon$ 1                                           | 76743        | GJE1            | 100126572      | Channel              |
| Gla1         | Glycine receptor, $\alpha$ 1 subunit                                         | 14654        | GLRA1           | 2741           | Channel              |
| Gla2         | Glycine receptor, $\alpha$ 2 subunit                                         | 237213       | GLRA2           | 2742           | Channel              |
| Gla3         | Glycine receptor, $\alpha$ 3 subunit                                         | 110304       | GLRA3           | 8001           | Channel              |
| Gla4         | Glycine receptor, $\alpha$ 4 subunit                                         | 14657        | GLRA4           | 441509         | Channel              |
| Glr1b        | Glycine receptor, $\beta$ subunit                                            | 14658        | GLRB            | 2743           | Channel              |
| Gpr89        | G protein-coupled receptor 89                                                | 67549        | GPR89A   GPR89B | 653519   51463 | Channel              |
| Gria1        | Glutamate receptor, ionotropic, AMPA1 ( $\alpha$ 1)                          | 14799        | GRIA1           | 2890           | Channel              |
| Gria2        | Glutamate receptor, ionotropic, AMPA2 ( $\alpha$ 2)                          | 14800        | GRIA2           | 2891           | Channel              |
| Gria3        | Glutamate receptor, ionotropic, AMPA3 ( $\alpha$ 3)                          | 53623        | GRIA3           | 2892           | Channel              |
| Gria4        | Glutamate receptor, ionotropic, AMPA4 ( $\alpha$ 4)                          | 14802        | GRIA4           | 2893           | Channel              |
| Grid1        | Glutamate receptor, ionotropic, $\delta$ 1                                   | 14803        | GRID1           | 2894           | Channel              |
| Grid2        | Glutamate receptor, ionotropic, $\delta$ 2                                   | 14804        | GRID2           | 2895           | Channel              |
| Grik1        | Glutamate receptor, ionotropic, kainate 1                                    | 14805        | GRIK1           | 2897           | Channel              |
| Grik2        | Glutamate receptor, ionotropic, kainate 2 ( $\beta$ 2)                       | 14806        | GRIK2           | 2898           | Channel              |
| Grik3        | Glutamate receptor, ionotropic, kainate 3                                    | 14807        | GRIK3           | 2899           | Channel              |
| Grik4        | Glutamate receptor, ionotropic, kainate 4                                    | 110637       | GRIK4           | 2900           | Channel              |
| Grik5        | Glutamate receptor, ionotropic, kainate 5 ( $\gamma$ 2)                      | 14809        | GRIK5           | 2901           | Channel              |
| Grin1        | Glutamate receptor, ionotropic, NMDA1 ( $\zeta$ 1)                           | 14810        | GRIN1           | 2902           | Channel              |
| Grin2a       | Glutamate receptor, ionotropic, NMDA2A ( $\epsilon$ 1)                       | 14811        | GRIN2A          | 2903           | Channel              |
| Grin2b       | Glutamate receptor, ionotropic, NMDA2B ( $\epsilon$ 2)                       | 14812        | GRIN2B          | 2904           | Channel              |
| Grin2c       | Glutamate receptor, ionotropic, NMDA2C ( $\epsilon$ 3)                       | 14813        | GRIN2C          | 2905           | Channel              |
| Grin2d       | Glutamate receptor, ionotropic, NMDA2D ( $\epsilon$ 4)                       | 14814        | GRIN2D          | 2906           | Channel              |
| Grin3a       | Glutamate receptor ionotropic, NMDA3A                                        | 242443       | GRIN3A          | 116443         | Channel              |
| Grin3b       | Glutamate receptor, ionotropic, NMDA3B                                       | 170483       | GRIN3B          | 116444         | Channel              |
| Hcn1         | Hyperpolarization activated cyclic nucleotide gated K <sup>+</sup> channel 1 | 15165        | HCN1            | 348980         | Channel              |
| Hcn2         | Hyperpolarization-activated, cyclic nucleotide-gated K <sup>+</sup> 2        | 15166        | HCN2            | 610            | Channel              |
| Hcn3         | Hyperpolarization-activated, cyclic nucleotide-gated K <sup>+</sup> 3        | 15168        | HCN3            | 57657          | Channel              |
| Hcn4         | Hyperpolarization-activated, cyclic nucleotide-gated K <sup>+</sup> 4        | 330953       | HCN4            | 10021          | Channel              |
| Htr3a        | 5-hydroxytryptamine (serotonin) receptor 3A                                  | 15561        | HTR3A           | 3359           | Channel              |
| Htr3b        | 5-hydroxytryptamine (serotonin) receptor 3B                                  | 57014        | HTR3B           | 9177           | Channel              |
| Hvcn1        | H <sup>+</sup> voltage-gated channel 1                                       | 74096        | HVCN1           | 84329          | Channel              |
| <b>Itpr1</b> | <b>Inositol 1,4,5-trisphosphate receptor 1</b>                               | <b>16438</b> | <b>ITPR1</b>    | <b>3708</b>    | <b>Channel</b>       |

| Mm Gene       | Mm Full Name                                                                           | Mm Gene ID   | Hs Gene        | Hs Gene ID       | Functional category* |
|---------------|----------------------------------------------------------------------------------------|--------------|----------------|------------------|----------------------|
| <b>Itpr2</b>  | <b>Inositol 1,4,5-triphosphate receptor 2</b>                                          | <b>16439</b> | <b>ITPR2</b>   | <b>3709</b>      | <b>Channel</b>       |
| <b>Itpr3</b>  | <b>Inositol 1,4,5-triphosphate receptor 3</b>                                          | <b>16440</b> | <b>ITPR3</b>   | <b>3710</b>      | <b>Channel</b>       |
| Kcna1         | K+ voltage-gated channel, shaker-related subfamily, member 1                           | 16485        | KCNA1          | 3736             | Channel              |
| Kcna10        | K+ voltage-gated channel, shaker-related subfamily, member 10                          | 242151       | KCNA10         | 3744             | Channel              |
| Kcna2         | K+ voltage-gated channel, shaker-related subfamily, member 2                           | 16490        | KCNA2          | 3737             | Channel              |
| <b>Kcna3</b>  | <b>K+ voltage-gated channel, shaker-related subfamily, member 3</b>                    | <b>16491</b> | <b>KCNA3</b>   | <b>3738</b>      | <b>Channel</b>       |
| Kcna4         | K+ voltage-gated channel, shaker-related subfamily, member 4                           | 16492        | KCNA4          | 3739             | Channel              |
| Kcna5         | K+ voltage-gated channel, shaker-related subfamily, member 5                           | 16493        | KCNA5          | 3741             | Channel              |
| Kcna6         | K+ voltage-gated channel, shaker-related, subfamily, member 6                          | 16494        | KCNA6          | 3742             | Channel              |
| Kcna7         | K+ voltage-gated channel, shaker-related subfamily, member 7                           | 16495        | KCNA7          | 3743             | Channel              |
| Kcnab1        | K+ voltage-gated channel, shaker-related subfamily, $\beta$ member 1                   | 16497        | KCNAB1         | 7881             | Channel              |
| <b>Kcnab2</b> | <b>K+ voltage-gated channel, shaker-related subfamily, <math>\beta</math> member 2</b> | <b>16498</b> | <b>KCNAB2</b>  | <b>8514</b>      | <b>Channel</b>       |
| Kcnab3        | K+ voltage-gated channel, shaker-related subfamily, $\beta$ member 3                   | 16499        | KCNAB3         | 9196             | Channel              |
| Kcnb1         | K+ voltage gated channel, Shab-related subfamily, member 1                             | 16500        | KCNB1          | 3745             | Channel              |
| Kcnb2         | K+ voltage gated channel, Shab-related subfamily, member 2                             | 98741        | KCNB2          | 9312             | Channel              |
| Kcnc1         | K+ voltage gated channel, Shaw-related subfamily, member 1                             | 16502        | KCNC1          | 3746             | Channel              |
| Kcnc2         | K+ voltage gated channel, Shaw-related subfamily, member 2                             | 268345       | KCNC2          | 3747             | Channel              |
| Kcnc3         | K+ voltage gated channel, Shaw-related subfamily, member 3                             | 16504        | KCNC3          | 3748             | Channel              |
| Kcnc4         | K+ voltage gated channel, Shaw-related subfamily, member 4                             | 99738        | KCNC4          | 3749             | Channel              |
| Kcnd1         | K+ voltage-gated channel, Shal-related family, member 1                                | 16506        | KCND1          | 3750             | Channel              |
| Kcnd2         | K+ voltage-gated channel, Shal-related family, member 2                                | 16508        | KCND2          | 3751             | Channel              |
| Kcnd3         | K+ voltage-gated channel, Shal-related family, member 3                                | 56543        | KCND3          | 3752             | Channel              |
| Kcne1         | K+ voltage-gated channel, Isk-related subfamily, member 1                              | 16509        | KCNE1   KCNE1B | 3753   102723475 | Channel              |
| Kcne1l        | K+ voltage-gated channel, Isk-related family, member 1-like, pseudogene                | 66240        | KCNE5          | 23630            | Channel              |
| Kcne2         | K+ voltage-gated channel, Isk-related subfamily, gene 2                                | 246133       | KCNE2          | 9992             | Channel              |
| Kcne3         | K+ voltage-gated channel, Isk-related subfamily, gene 3                                | 57442        | KCNE3          | 10008            | Channel              |
| Kcne4         | K+ voltage-gated channel, Isk-related subfamily, gene 4                                | 57814        | KCNE4          | 23704            | Channel              |
| Kcnf1         | K+ voltage-gated channel, subfamily F, member 1                                        | 382571       | KCNF1          | 3754             | Channel              |
| Kcng1         | K+ voltage-gated channel, subfamily G, member 1                                        | 241794       | KCNG1          | 3755             | Channel              |
| Kcng2         | K+ voltage-gated channel, subfamily G, member 2                                        | 240444       | KCNG2          | 26251            | Channel              |
| Kcng3         | K+ voltage-gated channel, subfamily G, member 3                                        | 225030       | KCNG3          | 170850           | Channel              |
| Kcng4         | K+ voltage-gated channel, subfamily G, member 4                                        | 66733        | KCNG4          | 93107            | Channel              |
| Kcnh1         | K+ voltage-gated channel, subfamily H (eag-related), member 1                          | 16510        | KCNH1          | 3756             | Channel              |
| Kcnh2         | K+ voltage-gated channel, subfamily H (eag-related), member 2                          | 16511        | KCNH2          | 3757             | Channel              |
| Kcnh3         | K+ voltage-gated channel, subfamily H (eag-related), member 3                          | 16512        | KCNH3          | 23416            | Channel              |

| <b>Mm Gene</b> | <b>Mm Full Name</b>                                                                      | <b>Mm Gene ID</b> | <b>Hs Gene</b> | <b>Hs Gene ID</b> | <b>Functional category*</b> |
|----------------|------------------------------------------------------------------------------------------|-------------------|----------------|-------------------|-----------------------------|
| Kcnh4          | K+ voltage-gated channel, subfamily H (eag-related), member 4                            | 380728            | KCNH4          | 23415             | Channel                     |
| Kcnh5          | K+ voltage-gated channel, subfamily H (eag-related), member 5                            | 238271            | KCNH5          | 27133             | Channel                     |
| Kcnh6          | K+ voltage-gated channel, subfamily H (eag-related), member 6                            | 192775            | KCNH6          | 81033             | Channel                     |
| Kcnh7          | K+ voltage-gated channel, subfamily H (eag-related), member 7                            | 170738            | KCNH7          | 90134             | Channel                     |
| Kcnh8          | K+ voltage-gated channel, subfamily H (eag-related), member 8                            | 211468            | KCNH8          | 131096            | Channel                     |
| Kcnp1          | Kv channel-interacting protein 1                                                         | 70357             | KCNIP1         | 30820             | Channel                     |
| Kcnp2          | Kv channel-interacting protein 2                                                         | 80906             | KCNIP2         | 30819             | Channel                     |
| Kcnp3          | Kv channel interacting protein 3, calsenilin                                             | 56461             | KCNIP3         | 30818             | Channel                     |
| Kcnp4          | Kv channel interacting protein 4                                                         | 80334             | KCNIP4         | 80333             | Channel                     |
| Kcnj1          | K+ inwardly-rectifying channel, subfamily J, member 1                                    | 56379             | KCNJ1          | 3758              | Channel                     |
| Kcnj10         | K+ inwardly-rectifying channel, subfamily J, member 10                                   | 16513             | KCNJ10         | 3766              | Channel                     |
| Kcnj11         | K+ inwardly rectifying channel, subfamily J, member 11                                   | 16514             | KCNJ11         | 3767              | Channel                     |
| Kcnj12         | K+ inwardly-rectifying channel, subfamily J, member 12                                   | 16515             | KCNJ12         | 3768              | Channel                     |
| Kcnj13         | K+ inwardly-rectifying channel, subfamily J, member 13                                   | 100040591         | KCNJ13         | 3769              | Channel                     |
| Kcnj14         | K+ inwardly-rectifying channel, subfamily J, member 14                                   | 211480            | KCNJ14         | 3770              | Channel                     |
| Kcnj15         | K+ inwardly-rectifying channel, subfamily J, member 15                                   | 16516             | KCNJ15         | 3772              | Channel                     |
| Kcnj16         | K+ inwardly-rectifying channel, subfamily J, member 16                                   | 16517             | KCNJ16         | 3773              | Channel                     |
| Kcnj2          | K+ inwardly-rectifying channel, subfamily J, member 2                                    | 16518             | KCNJ2          | 3759              | Channel                     |
| Kcnj3          | K+ inwardly-rectifying channel, subfamily J, member 3                                    | 16519             | KCNJ3          | 3760              | Channel                     |
| Kcnj4          | K+ inwardly-rectifying channel, subfamily J, member 4                                    | 16520             | KCNJ4          | 3761              | Channel                     |
| Kcnj5          | K+ inwardly-rectifying channel, subfamily J, member 5                                    | 16521             | KCNJ5          | 3762              | Channel                     |
| Kcnj6          | K+ inwardly-rectifying channel, subfamily J, member 6                                    | 16522             | KCNJ6          | 3763              | Channel                     |
| Kcnj8          | K+ inwardly-rectifying channel, subfamily J, member 8                                    | 16523             | KCNJ8          | 3764              | Channel                     |
| Kcnj9          | K+ inwardly-rectifying channel, subfamily J, member 9                                    | 16524             | KCNJ9          | 3765              | Channel                     |
| Kcnk1          | K+ channel, subfamily K, member 1                                                        | 16525             | KCNK1          | 3775              | Channel                     |
| Kcnk10         | K+ channel, subfamily K, member 10                                                       | 72258             | KCNK10         | 54207             | Channel                     |
| Kcnk12         | K+ channel, subfamily K, member 12                                                       | 210741            | KCNK12         | 56660             | Channel                     |
| Kcnk13         | K+ channel, subfamily K, member 13                                                       | 217826            | KCNK13         | 56659             | Channel                     |
| Kcnk15         | K+ channel, subfamily K, member 15                                                       | 241769            | KCNK15         | 60598             | Channel                     |
| Kcnk16         | K+ channel, subfamily K, member 16                                                       | 74571             | KCNK16         | 83795             | Channel                     |
| Kcnk18         | K+ channel, subfamily K, member 18                                                       | 332396            | KCNK18         | 338567            | Channel                     |
| Kcnk2          | K+ channel, subfamily K, member 2                                                        | 16526             | KCNK2          | 3776              | Channel                     |
| Kcnk3          | K+ channel, subfamily K, member 3                                                        | 16527             | KCNK3          | 3777              | Channel                     |
| Kcnk4          | K+ channel, subfamily K, member 4                                                        | 16528             | KCNK4          | 50801             | Channel                     |
| Kcnk5          | K+ channel, subfamily K, member 5                                                        | 16529             | KCNK5          | 8645              | Channel                     |
| Kcnk6          | K+ inwardly-rectifying channel, subfamily K, member 6                                    | 52150             | KCNK6          | 9424              | Channel                     |
| Kcnk7          | K+ channel, subfamily K, member 7                                                        | 16530             | KCNK7          | 10089             | Channel                     |
| Kcnk9          | K+ channel, subfamily K, member 9                                                        | 223604            | KCNK9          | 51305             | Channel                     |
| Kcnma1         | K+ large conductance Ca <sup>2+</sup> -activated channel, subfamily M, $\alpha$ member 1 | 16531             | KCNMA1         | 3778              | Channel                     |
| Kcnmb1         | K+ large conductance Ca <sup>2+</sup> -activated channel, subfamily M, $\beta$ member 1  | 16533             | KCNMB1         | 3779              | Channel                     |
| Kcnmb2         | K+ large conductance Ca <sup>2+</sup> -activated channel, subfamily M, $\beta$ member 2  | 72413             | KCNMB2         | 10242             | Channel                     |
| Kcnmb3         | K+ large conductance Ca <sup>2+</sup> -activated channel, subfamily M, $\beta$ member 3  | 100502876         | KCNMB3         | 27094             | Channel                     |



| Mm Gene       | Mm Full Name                                                                                      | Mm Gene ID    | Hs Gene       | Hs Gene ID    | Functional category* |
|---------------|---------------------------------------------------------------------------------------------------|---------------|---------------|---------------|----------------------|
| Kcnmb4        | K+ large conductance Ca <sup>2+</sup> -activated channel, subfamily M, $\beta$ member 4           | 58802         | KCNMB4        | 27345         | Channel              |
| Kcnn1         | K+ intermediate/small conductance Ca <sup>2+</sup> -activated channel, subfamily N, member 1      | 84036         | KCNN1         | 3780          | Channel              |
| Kcnn2         | K+ intermediate/small conductance Ca <sup>2+</sup> -activated channel, subfamily N, member 2      | 140492        | KCNN2         | 3781          | Channel              |
| Kcnn3         | K+ intermediate/small conductance Ca <sup>2+</sup> -activated channel, subfamily N, member 3      | 140493        | KCNN3         | 3782          | Channel              |
| <b>Kcnn4</b>  | <b>K+ intermediate/small conductance Ca<sup>2+</sup>-activated channel, subfamily N, member 4</b> | <b>16534</b>  | <b>KCNN4</b>  | <b>3783</b>   | <b>Channel</b>       |
| Kcnq1         | K+ voltage-gated channel, subfamily Q, member 1                                                   | 16535         | KCNQ1         | 3784          | Channel              |
| Kcnq2         | K+ voltage-gated channel, subfamily Q, member 2                                                   | 16536         | KCNQ2         | 3785          | Channel              |
| Kcnq3         | K+ voltage-gated channel, subfamily Q, member 3                                                   | 110862        | KCNQ3         | 3786          | Channel              |
| Kcnq4         | K+ voltage-gated channel, subfamily Q, member 4                                                   | 60613         | KCNQ4         | 9132          | Channel              |
| Kcnq5         | K+ voltage-gated channel, subfamily Q, member 5                                                   | 226922        | KCNQ5         | 56479         | Channel              |
| Kcns1         | K+ voltage-gated channel, subfamily S, 1                                                          | 16538         | KCNS1         | 3787          | Channel              |
| Kcns2         | K+ voltage-gated channel, subfamily S, 2                                                          | 16539         | KCNS2         | 3788          | Channel              |
| Kcns3         | K+ voltage-gated channel, delayed-rectifier, subfamily S, member 3                                | 238076        | KCNS3         | 3790          | Channel              |
| Kcnt1         | K+ channel, subfamily T, member 1                                                                 | 227632        | KCNT1         | 57582         | Channel              |
| Kcnt2         | K+ channel, subfamily T, member 2                                                                 | 240776        | KCNT2         | 343450        | Channel              |
| Kcnu1         | K+ channel, subfamily U, member 1                                                                 | 16532         | KCNU1         | 157855        | Channel              |
| Kcnv1         | K+ channel, subfamily V, member 1                                                                 | 67498         | KCNV1         | 27012         | Channel              |
| Kcnv2         | K+ channel, subfamily V, member 2                                                                 | 240595        | KCNV2         | 169522        | Channel              |
| Kctd1         | K+ channel tetramerisation domain containing 1                                                    | 106931        | KCTD1         | 284252        | Channel              |
| <b>Kctd10</b> | <b>K+ channel tetramerisation domain containing 10</b>                                            | <b>330171</b> | <b>KCTD10</b> | <b>83892</b>  | <b>Channel</b>       |
| Kctd11        | K+ channel tetramerisation domain containing 11                                                   | 216858        | KCTD11        | 147040        | Channel              |
| Kctd12        | K+ channel tetramerisation domain containing 12                                                   | 239217        | KCTD12        | 115207        | Channel              |
| <b>Kctd13</b> | <b>K+ channel tetramerisation domain containing 13</b>                                            | <b>233877</b> | <b>KCTD13</b> | <b>253980</b> | <b>Channel</b>       |
| Kctd15        | K+ channel tetramerisation domain containing 15                                                   | 233107        | KCTD15        | 79047         | Channel              |
| Kctd16        | K+ channel tetramerisation domain containing 16                                                   | 383348        | KCTD16        | 57528         | Channel              |
| Kctd17        | K+ channel tetramerisation domain containing 17                                                   | 72844         | KCTD17        | 79734         | Channel              |
| <b>Kctd18</b> | <b>K+ channel tetramerisation domain containing 18</b>                                            | <b>51960</b>  | <b>KCTD18</b> | <b>130535</b> | <b>Channel</b>       |
| Kctd19        | K+ channel tetramerisation domain containing 19                                                   | 279499        | KCTD19        | 146212        | Channel              |
| Kctd2         | K+ channel tetramerisation domain containing 2                                                    | 70382         | KCTD2         | 23510         | Channel              |
| <b>Kctd20</b> | <b>K+ channel tetramerisation domain containing 20</b>                                            | <b>66989</b>  | <b>KCTD20</b> | <b>222658</b> | <b>Channel</b>       |
| Kctd21        | K+ channel tetramerisation domain containing 21                                                   | 622320        | KCTD21        | 283219        | Channel              |
| Kctd3         | K+ channel tetramerisation domain containing 3                                                    | 226823        | KCTD3         | 51133         | Channel              |
| <b>Kctd5</b>  | <b>K+ channel tetramerisation domain containing 5</b>                                             | <b>69259</b>  | <b>KCTD5</b>  | <b>54442</b>  | <b>Channel</b>       |
| Kctd6         | K+ channel tetramerisation domain containing 6                                                    | 71393         | KCTD6         | 200845        | Channel              |
| Kctd7         | K+ channel tetramerisation domain containing 7                                                    | 212919        | KCTD7         | 154881        | Channel              |
| Kctd8         | K+ channel tetramerisation domain containing 8                                                    | 243043        | KCTD8         | 386617        | Channel              |
| Kctd9         | K+ channel tetramerisation domain containing 9                                                    | 105440        | KCTD9         | 54793         | Channel              |
| Lrrc26        | Leucine rich repeat containing 26                                                                 | 227618        | LRRC26        | 389816        | Channel              |
| Lrrc38        | Leucine rich repeat containing 38                                                                 | 242735        | LRRC38        | 126755        | Channel              |
| Lrrc52        | Leucine rich repeat containing 52                                                                 | 240899        | LRRC52        | 440699        | Channel              |
| Lrrc55        | Leucine rich repeat containing 55                                                                 | 241528        | LRRC55        | 219527        | Channel              |
| <b>Lrrc8a</b> | <b>Leucine rich repeat containing 8A VRAC subunit A</b>                                           | <b>241296</b> | <b>LRRC8A</b> | <b>56262</b>  | <b>Channel</b>       |
| Lrrc8b        | Leucine rich repeat containing 8 family, member B                                                 | 433926        | LRRC8B        | 23507         | Channel              |
| <b>Lrrc8c</b> | <b>Leucine rich repeat containing 8 family, member C</b>                                          | <b>100604</b> | <b>LRRC8C</b> | <b>84230</b>  | <b>Channel</b>       |
| Lrrc8d        | Leucine rich repeat containing 8D                                                                 | 231549        | LRRC8D        | 55144         | Channel              |

| Mm Gene      | Mm Full Name                                                              | Mm Gene ID    | Hs Gene      | Hs Gene ID   | Functional category* |
|--------------|---------------------------------------------------------------------------|---------------|--------------|--------------|----------------------|
| Lrrc8e       | Leucine rich repeat containing 8 family, member E                         | 72267         | LRRC8E       | 80131        | Channel              |
| Mcoln1       | Mucolipin 1                                                               | 94178         | MCOLN1       | 57192        | Channel              |
| Mcoln2       | Mucolipin 2                                                               | 68279         | MCOLN2       | 255231       | Channel              |
| Mcoln3       | Mucolipin 3                                                               | 171166        | MCOLN3       | 55283        | Channel              |
| Mmd          | Monocyte to macrophage differentiation-associated                         | 67468         | MMD          | 23531        | Channel              |
| Nalcn        | Na <sup>+</sup> leak channel, non-selective                               | 338370        | NALCN        | 259232       | Channel              |
| <b>Orai1</b> | <b>ORAI Ca<sup>2+</sup> release-activated Ca<sup>2+</sup> modulator 1</b> | <b>109305</b> | <b>ORAI1</b> | <b>84876</b> | <b>Channel</b>       |
| <b>Orai2</b> | <b>ORAI Ca<sup>2+</sup> release-activated Ca<sup>2+</sup> modulator 2</b> | <b>269717</b> | <b>ORAI2</b> | <b>80228</b> | <b>Channel</b>       |
| Orai3        | ORAI Ca <sup>2+</sup> release-activated Ca <sup>2+</sup> modulator 3      | 269999        | ORAI3        | 93129        | Channel              |
| Otop1        | Otopetrin 1                                                               | 21906         | OTOP1        | 133060       | Channel              |
| Otop2        | Otopetrin 2                                                               | 237987        | OTOP2        | 92736        | Channel              |
| Otop3        | Otopetrin 3                                                               | 69602         | OTOP3        | 347741       | Channel              |
| P2rx1        | Purinergic receptor P2X, ligand-gated ion channel, 1                      | 18436         | P2RX1        | 5023         | Channel              |
| P2rx2        | Purinergic receptor P2X, ligand-gated ion channel, 2                      | 231602        | P2RX2        | 22953        | Channel              |
| P2rx3        | Purinergic receptor P2X, ligand-gated ion channel, 3                      | 228139        | P2RX3        | 5024         | Channel              |
| <b>P2rx4</b> | <b>Purinergic receptor P2X, ligand-gated ion channel 4</b>                | <b>18438</b>  | <b>P2RX4</b> | <b>5025</b>  | <b>Channel</b>       |
| P2rx5        | Purinergic receptor P2X, ligand-gated ion channel, 5                      | 94045         | P2RX5        | 5026         | Channel              |
| P2rx6        | Purinergic receptor P2X, ligand-gated ion channel, 6                      | 18440         | P2RX6        | 9127         | Channel              |
| <b>P2rx7</b> | <b>Purinergic receptor P2X, ligand-gated ion channel, 7</b>               | <b>18439</b>  | <b>P2RX7</b> | <b>5027</b>  | <b>Channel</b>       |
| Pacc1        | Proton activated chloride channel 1                                       | 66950         | PACC1        | 55248        | Channel              |
| <b>Panx1</b> | <b>Pannexin 1</b>                                                         | <b>55991</b>  | <b>PANX1</b> | <b>24145</b> | <b>Channel</b>       |
| Panx2        | Pannexin 2                                                                | 406218        | PANX2        | 56666        | Channel              |
| Panx3        | Pannexin 3                                                                | 208098        | PANX3        | 116337       | Channel              |
| Piezo1       | Piezo-type mechanosensitive ion channel component 1                       | 234839        | PIEZO1       | 9780         | Channel              |
| Piezo2       | Piezo-type mechanosensitive ion channel component 2                       | 667742        | PIEZO2       | 63895        | Channel              |
| Pkd1         | Polycystin 1, transient receptor potential channel interacting            | 18763         | PKD1         | 5310         | Channel              |
| Pkd111       | Polycystic kidney disease 1 like 1                                        | 171395        | PKD1L1       | 168507       | Channel              |
| Pkd112       | Polycystic kidney disease 1 like 2                                        | 76645         | PKD1L2       | 114780       | Channel              |
| Pkd113       | Polycystic kidney disease 1 like 3                                        | 244646        | PKD1L3       | 342372       | Channel              |
| Pkd2         | Polycystin 2, transient receptor potential cation channel                 | 18764         | PKD2         | 5311         | Channel              |
| Pkd211       | Polycystic kidney disease 2-like 1                                        | 329064        | PKD2L1       | 9033         | Channel              |
| Pkd212       | Polycystic kidney disease 2-like 2                                        | 53871         | PKD2L2       | 27039        | Channel              |
| Pkdrej       | Polycystin (PKD) family receptor for egg jelly                            | 18766         | PKDREJ       | 10343        | Channel              |
| Ryr1         | Ryanodine receptor 1, skeletal muscle                                     | 20190         | RYR1         | 6261         | Channel              |
| Ryr2         | Ryanodine receptor 2, cardiac                                             | 20191         | RYR2         | 6262         | Channel              |
| Ryr3         | Ryanodine receptor 3                                                      | 20192         | RYR3         | 6263         | Channel              |
| Scn10a       | Na <sup>+</sup> channel, voltage-gated, type X, $\alpha$                  | 20264         | SCN10A       | 6336         | Channel              |
| Scn11a       | Na <sup>+</sup> channel, voltage-gated, type XI, $\alpha$                 | 24046         | SCN11A       | 11280        | Channel              |
| Scn1a        | Na <sup>+</sup> channel, voltage-gated, type I, $\alpha$                  | 20265         | SCN1A        | 6323         | Channel              |
| Scn1b        | Na <sup>+</sup> channel, voltage-gated, type I, $\beta$                   | 20266         | SCN1B        | 6324         | Channel              |
| Scn2a        | Na <sup>+</sup> channel, voltage-gated, type II, $\alpha$                 | 110876        | SCN2A        | 6326         | Channel              |
| Scn2b        | Na <sup>+</sup> channel, voltage-gated, type II, $\beta$                  | 72821         | SCN2B        | 6327         | Channel              |
| Scn3a        | Na <sup>+</sup> channel, voltage-gated, type III, $\alpha$                | 20269         | SCN3A        | 6328         | Channel              |
| Scn3b        | Na <sup>+</sup> channel, voltage-gated, type III, $\beta$                 | 235281        | SCN3B        | 55800        | Channel              |
| Scn4a        | Na <sup>+</sup> channel, voltage-gated, type IV, $\alpha$                 | 110880        | SCN4A        | 6329         | Channel              |
| Scn4b        | Na <sup>+</sup> channel, type IV, $\beta$                                 | 399548        | SCN4B        | 6330         | Channel              |
| Scn5a        | Na <sup>+</sup> channel, voltage-gated, type V, $\alpha$                  | 20271         | SCN5A        | 6331         | Channel              |
| Scn7a        | Na <sup>+</sup> channel, voltage-gated, type VII, $\alpha$                | 20272         | SCN7A        | 6332         | Channel              |

| <b>Mm Gene</b> | <b>Mm Full Name</b>                                                | <b>Mm Gene ID</b> | <b>Hs Gene</b> | <b>Hs Gene ID</b> | <b>Functional category*</b> |
|----------------|--------------------------------------------------------------------|-------------------|----------------|-------------------|-----------------------------|
| Scn8a          | Na <sup>+</sup> channel, voltage-gated, type VIII, $\alpha$        | 20273             | SCN8A          | 6334              | Channel                     |
| Scn9a          | Na <sup>+</sup> channel, voltage-gated, type IX, $\alpha$          | 20274             | SCN9A          | 6335              | Channel                     |
| Scnn1a         | Na <sup>+</sup> channel, nonvoltage-gated 1 $\alpha$               | 20276             | SCNN1A         | 6337              | Channel                     |
| Scnn1b         | Na <sup>+</sup> channel, nonvoltage-gated 1 $\beta$                | 20277             | SCNN1B         | 6338              | Channel                     |
| Scnn1g         | Na <sup>+</sup> channel, nonvoltage-gated 1 $\gamma$               | 20278             | SCNN1G         | 6340              | Channel                     |
| <b>Tm9sf2</b>  | <b>Transmembrane 9 superfamily member 2</b>                        | <b>68059</b>      | <b>TM9SF2</b>  | <b>9375</b>       | <b>Channel</b>              |
| Tmc1           | Transmembrane channel-like gene family 1                           | 13409             | TMC1           | 117531            | Channel                     |
| Tmc2           | Transmembrane channel-like gene family 2                           | 192140            | TMC2           | 117532            | Channel                     |
| Tmc3           | Transmembrane channel-like gene family 3                           | 233424            | TMC3           | 342125            | Channel                     |
| Tmc4           | Transmembrane channel-like gene family 4                           | 353499            | TMC4           | 147798            | Channel                     |
| Tmc5           | Transmembrane channel-like gene family 5                           | 74424             | TMC5           | 79838             | Channel                     |
| <b>Tmc6</b>    | <b>Transmembrane channel-like gene family 6</b>                    | <b>217353</b>     | <b>TMC6</b>    | <b>11322</b>      | <b>Channel</b>              |
| Tmc7           | Transmembrane channel-like gene family 7                           | 209760            | TMC7           | 79905             | Channel                     |
| <b>Tmc8</b>    | <b>Transmembrane channel-like gene family 8</b>                    | <b>217356</b>     | <b>TMC8</b>    | <b>147138</b>     | <b>Channel</b>              |
| <b>Tmco1</b>   | <b>Transmembrane and coiled-coil domains 1</b>                     | <b>68944</b>      | <b>TMCO1</b>   | <b>54499</b>      | <b>Channel</b>              |
| <b>Tmem109</b> | <b>Transmembrane protein 109</b>                                   | <b>68539</b>      | <b>TMEM109</b> | <b>79073</b>      | <b>Channel</b>              |
| <b>Tmem175</b> | <b>Transmembrane protein 175</b>                                   | <b>72392</b>      | <b>TMEM175</b> | <b>84286</b>      | <b>Channel</b>              |
| Tmem37         | Transmembrane protein 37                                           | 170706            | TMEM37         | 140738            | Channel                     |
| <b>Tmem38a</b> | <b>Transmembrane protein 38A</b>                                   | <b>74166</b>      | <b>TMEM38A</b> | <b>79041</b>      | <b>Channel</b>              |
| Tmem38b        | Transmembrane protein 38B                                          | 52076             | TMEM38B        | 55151             | Channel                     |
| <b>Tmem63a</b> | <b>Transmembrane protein 63a</b>                                   | <b>208795</b>     | <b>TMEM63A</b> | <b>9725</b>       | <b>Channel</b>              |
| <b>Tmem63b</b> | <b>Transmembrane protein 63b</b>                                   | <b>224807</b>     | <b>TMEM63B</b> | <b>55362</b>      | <b>Channel</b>              |
| Tmem63c        | Transmembrane protein 63c                                          | 217733            | TMEM63C        | 57156             | Channel                     |
| <b>Tpcn1</b>   | <b>Two pore channel 1</b>                                          | <b>252972</b>     | <b>TPCN1</b>   | <b>53373</b>      | <b>Channel</b>              |
| <b>Tpcn2</b>   | <b>Two pore segment channel 2</b>                                  | <b>233979</b>     | <b>TPCN2</b>   | <b>219931</b>     | <b>Channel</b>              |
| Trpa1          | Transient receptor potential cation channel, subfamily A, member 1 | 277328            | TRPA1          | 8989              | Channel                     |
| Trpc1          | Transient receptor potential cation channel, subfamily C, member 1 | 22063             | TRPC1          | 7220              | Channel                     |
| Trpc2          | Transient receptor potential cation channel, subfamily C, member 2 | 22064             | TRPC2          | 7221              | Channel                     |
| Trpc3          | Transient receptor potential cation channel, subfamily C, member 3 | 22065             | TRPC3          | 7222              | Channel                     |
| Trpc4          | Transient receptor potential cation channel, subfamily C, member 4 | 22066             | TRPC4          | 7223              | Channel                     |
| Trpc5          | Transient receptor potential cation channel, subfamily C, member 5 | 22067             | TRPC5          | 7224              | Channel                     |
| Trpc6          | Transient receptor potential cation channel, subfamily C, member 6 | 22068             | TRPC6          | 7225              | Channel                     |
| Trpc7          | Transient receptor potential cation channel, subfamily C, member 7 | 26946             | TRPC7          | 57113             | Channel                     |
| Trpm1          | Transient receptor potential cation channel, subfamily M, member 1 | 17364             | TRPM1          | 4308              | Channel                     |
| Trpm2          | Transient receptor potential cation channel, subfamily M, member 2 | 28240             | TRPM2          | 7226              | Channel                     |
| Trpm3          | Transient receptor potential cation channel, subfamily M, member 3 | 226025            | TRPM3          | 80036             | Channel                     |
| Trpm4          | Transient receptor potential cation channel, subfamily M, member 4 | 68667             | TRPM4          | 54795             | Channel                     |
| Trpm5          | Transient receptor potential cation channel, subfamily M, member 5 | 56843             | TRPM5          | 29850             | Channel                     |
| Trpm6          | Transient receptor potential cation channel, subfamily M, member 6 | 225997            | TRPM6          | 140803            | Channel                     |

| Mm Gene        | Mm Full Name                                                                                | Mm Gene ID    | Hs Gene        | Hs Gene ID   | Functional category* |
|----------------|---------------------------------------------------------------------------------------------|---------------|----------------|--------------|----------------------|
| <b>Trpm7</b>   | <b>Transient receptor potential cation channel, subfamily M, member 7</b>                   | <b>58800</b>  | <b>TRPM7</b>   | <b>54822</b> | <b>Channel</b>       |
| Trpm8          | Transient receptor potential cation channel, subfamily M, member 8                          | 171382        | TRPM8          | 79054        | Channel              |
| Trpv1          | Transient receptor potential cation channel, subfamily V, member 1                          | 193034        | TRPV1          | 7442         | Channel              |
| <b>Trpv2</b>   | <b>Transient receptor potential cation channel, subfamily V, member 2</b>                   | <b>22368</b>  | <b>TRPV2</b>   | <b>51393</b> | <b>Channel</b>       |
| Trpv3          | Transient receptor potential cation channel, subfamily V, member 3                          | 246788        | TRPV3          | 162514       | Channel              |
| Trpv4          | Transient receptor potential cation channel, subfamily V, member 4                          | 63873         | TRPV4          | 59341        | Channel              |
| Trpv5          | Transient receptor potential cation channel, subfamily V, member 5                          | 194352        | TRPV5          | 56302        | Channel              |
| Trpv6          | Transient receptor potential cation channel, subfamily V, member 6                          | 64177         | TRPV6          | 55503        | Channel              |
| Ttyh1          | Tweety family member 1                                                                      | 57776         | TTYH1          | 57348        | Channel              |
| Ttyh2          | Tweety family member 2                                                                      | 117160        | TTYH2          | 94015        | Channel              |
| Ttyh3          | Tweety family member 3                                                                      | 78339         | TTYH3          | 80727        | Channel              |
| <b>Vdac1</b>   | <b>Voltage-dependent anion channel 1</b>                                                    | <b>22333</b>  | <b>VDAC1</b>   | <b>7416</b>  | <b>Channel</b>       |
| <b>Vdac2</b>   | <b>Voltage-dependent anion channel 2</b>                                                    | <b>22334</b>  | <b>VDAC2</b>   | <b>7417</b>  | <b>Channel</b>       |
| <b>Vdac3</b>   | <b>Voltage-dependent anion channel 3</b>                                                    | <b>22335</b>  | <b>VDAC3</b>   | <b>7419</b>  | <b>Channel</b>       |
|                |                                                                                             |               |                |              |                      |
| <b>Asna1</b>   | <b>ArsA arsenite transporter, ATP-binding, homolog 1 (bacterial)</b>                        | <b>56495</b>  | <b>GET3</b>    | <b>439</b>   | <b>Transporter</b>   |
| Atp12a         | ATPase, H <sup>+</sup> /K <sup>+</sup> transporting, nongastric, $\alpha$ polypeptide       | 192113        | ATP12A         | 479          | Transporter          |
| <b>Atp13a1</b> | <b>ATPase type 13A1</b>                                                                     | <b>170759</b> | <b>ATP13A1</b> | <b>57130</b> | <b>Transporter</b>   |
| <b>Atp13a2</b> | <b>ATPase type 13A2</b>                                                                     | <b>74772</b>  | <b>ATP13A2</b> | <b>23400</b> | <b>Transporter</b>   |
| <b>Atp13a3</b> | <b>ATPase type 13A3</b>                                                                     | <b>224088</b> | <b>ATP13A3</b> | <b>79572</b> | <b>Transporter</b>   |
| Atp13a4        | ATPase type 13A4                                                                            | 224079        | ATP13A4        | 84239        | Transporter          |
| Atp13a5        | ATPase type 13A5                                                                            | 268878        | ATP13A5        | 344905       | Transporter          |
| <b>Atp1a1</b>  | <b>ATPase, Na<sup>+</sup>/K<sup>+</sup> transporting, <math>\alpha</math> 1 polypeptide</b> | <b>11928</b>  | <b>ATP1A1</b>  | <b>476</b>   | <b>Transporter</b>   |
| Atp1a2         | ATPase, Na <sup>+</sup> /K <sup>+</sup> transporting, $\alpha$ 2 polypeptide                | 98660         | ATP1A2         | 477          | Transporter          |
| Atp1a3         | ATPase, Na <sup>+</sup> /K <sup>+</sup> transporting, $\alpha$ 3 polypeptide                | 232975        | ATP1A3         | 478          | Transporter          |
| Atp1a4         | ATPase, Na <sup>+</sup> /K <sup>+</sup> transporting, $\alpha$ 4 polypeptide                | 27222         | ATP1A4         | 480          | Transporter          |
| Atp1b1         | ATPase, Na <sup>+</sup> /K <sup>+</sup> transporting, $\beta$ 1 polypeptide                 | 11931         | ATP1B1         | 481          | Transporter          |
| Atp1b2         | ATPase, Na <sup>+</sup> /K <sup>+</sup> transporting, $\beta$ 2 polypeptide                 | 11932         | ATP1B2         | 482          | Transporter          |
| <b>Atp1b3</b>  | <b>ATPase, Na<sup>+</sup>/K<sup>+</sup> transporting, <math>\beta</math> 3 polypeptide</b>  | <b>11933</b>  | <b>ATP1B3</b>  | <b>483</b>   | <b>Transporter</b>   |
| Atp1b4         | ATPase, (Na <sup>+</sup> )/K <sup>+</sup> transporting, $\beta$ 4 polypeptide               | 67821         | ATP1B4         | 23439        | Transporter          |
| Atp2a1         | ATPase, Ca <sup>2+</sup> transporting, cardiac muscle, fast twitch 1                        | 11937         | ATP2A1         | 487          | Transporter          |
| <b>Atp2a2</b>  | <b>ATPase, Ca<sup>2+</sup> transporting, cardiac muscle, slow twitch 2</b>                  | <b>11938</b>  | <b>ATP2A2</b>  | <b>488</b>   | <b>Transporter</b>   |
| <b>Atp2a3</b>  | <b>ATPase, Ca<sup>2+</sup> transporting, ubiquitous</b>                                     | <b>53313</b>  | <b>ATP2A3</b>  | <b>489</b>   | <b>Transporter</b>   |
| <b>Atp2b1</b>  | <b>ATPase, Ca<sup>2+</sup> transporting, plasma membrane 1</b>                              | <b>67972</b>  | <b>ATP2B1</b>  | <b>490</b>   | <b>Transporter</b>   |
| Atp2b2         | ATPase, Ca <sup>2+</sup> transporting, plasma membrane 2                                    | 11941         | ATP2B2         | 491          | Transporter          |
| Atp2b3         | ATPase, Ca <sup>2+</sup> transporting, plasma membrane 3                                    | 320707        | ATP2B3         | 492          | Transporter          |
| <b>Atp2b4</b>  | <b>ATPase, Ca<sup>2+</sup> transporting, plasma membrane 4</b>                              | <b>381290</b> | <b>ATP2B4</b>  | <b>493</b>   | <b>Transporter</b>   |
| <b>Atp2c1</b>  | <b>ATPase, Ca<sup>2+</sup>-sequestering</b>                                                 | <b>235574</b> | <b>ATP2C1</b>  | <b>27032</b> | <b>Transporter</b>   |
| Atp2c2         | ATPase, Ca <sup>2+</sup> transporting, type 2C, member 2                                    | 69047         | ATP2C2         | 9914         | Transporter          |
| Atp4a          | ATPase, H <sup>+</sup> /K <sup>+</sup> exchanging, gastric, $\alpha$ polypeptide            | 11944         | ATP4A          | 495          | Transporter          |
| Atp4b          | ATPase, H <sup>+</sup> /K <sup>+</sup> exchanging, $\beta$ polypeptide                      | 11945         | ATP4B          | 496          | Transporter          |
| <b>Atp6ap1</b> | <b>ATPase, H<sup>+</sup> transporting, lysosomal accessory protein 1</b>                    | <b>54411</b>  | <b>ATP6AP1</b> | <b>537</b>   | <b>Transporter</b>   |

| Mm Gene         | Mm Full Name                                                                 | Mm Gene ID    | Hs Gene         | Hs Gene ID    | Functional category* |
|-----------------|------------------------------------------------------------------------------|---------------|-----------------|---------------|----------------------|
| Atp6ap1l        | ATPase, H+ transporting, lysosomal accessory protein 1-like                  | 435376        | ATP6AP1L        | 92270         | Transporter          |
| <b>Atp6ap2</b>  | <b>ATPase, H+ transporting, lysosomal accessory protein 2</b>                | <b>70495</b>  | <b>ATP6AP2</b>  | <b>10159</b>  | <b>Transporter</b>   |
| Atp6v0a1        | ATPase, H+ transporting, lysosomal V0 subunit A1                             | 11975         | ATP6V0A1        | 535           | Transporter          |
| <b>Atp6v0a2</b> | <b>ATPase, H+ transporting, lysosomal V0 subunit A2</b>                      | <b>21871</b>  | <b>ATP6V0A2</b> | <b>23545</b>  | <b>Transporter</b>   |
| Atp6v0a4        | ATPase, H+ transporting, lysosomal V0 subunit A4                             | 140494        | ATP6V0A4        | 50617         | Transporter          |
| <b>Atp6v0b</b>  | <b>ATPase, H+ transporting, lysosomal V0 subunit B</b>                       | <b>114143</b> | <b>ATP6V0B</b>  | <b>533</b>    | <b>Transporter</b>   |
| <b>Atp6v0c</b>  | <b>ATPase, H+ transporting, lysosomal V0 subunit C</b>                       | <b>11984</b>  | <b>ATP6V0C</b>  | <b>527</b>    | <b>Transporter</b>   |
| <b>Atp6v0d1</b> | <b>ATPase, H+ transporting, lysosomal V0 subunit D1</b>                      | <b>11972</b>  | <b>ATP6V0D1</b> | <b>9114</b>   | <b>Transporter</b>   |
| Atp6v0d2        | ATPase, H+ transporting, lysosomal V0 subunit D2                             | 242341        | ATP6V0D2        | 245972        | Transporter          |
| <b>Atp6v0e</b>  | <b>ATPase, H+ transporting, lysosomal V0 subunit E</b>                       | <b>11974</b>  | <b>ATP6V0E1</b> | <b>8992</b>   | <b>Transporter</b>   |
| <b>Atp6v0e2</b> | <b>ATPase, H+ transporting, lysosomal V0 subunit E2</b>                      | <b>76252</b>  | <b>ATP6V0E2</b> | <b>155066</b> | <b>Transporter</b>   |
| <b>Atp6v1a</b>  | <b>ATPase, H+ transporting, lysosomal V1 subunit A</b>                       | <b>11964</b>  | <b>ATP6V1A</b>  | <b>523</b>    | <b>Transporter</b>   |
| Atp6v1b1        | ATPase, H+ transporting, lysosomal V1 subunit B1                             | 110935        | ATP6V1B1        | 525           | Transporter          |
| <b>Atp6v1b2</b> | <b>ATPase, H+ transporting, lysosomal V1 subunit B2</b>                      | <b>11966</b>  | <b>ATP6V1B2</b> | <b>526</b>    | <b>Transporter</b>   |
| <b>Atp6v1c1</b> | <b>ATPase, H+ transporting, lysosomal V1 subunit C1</b>                      | <b>66335</b>  | <b>ATP6V1C1</b> | <b>528</b>    | <b>Transporter</b>   |
| Atp6v1c2        | ATPase, H+ transporting, lysosomal V1 subunit C2                             | 68775         | ATP6V1C2        | 245973        | Transporter          |
| <b>Atp6v1d</b>  | <b>ATPase, H+ transporting, lysosomal V1 subunit D</b>                       | <b>73834</b>  | <b>ATP6V1D</b>  | <b>51382</b>  | <b>Transporter</b>   |
| <b>Atp6v1e1</b> | <b>ATPase, H+ transporting, lysosomal V1 subunit E1</b>                      | <b>11973</b>  | <b>ATP6V1E1</b> | <b>529</b>    | <b>Transporter</b>   |
| Atp6v1e2        | ATPase, H+ transporting, lysosomal V1 subunit E2                             | 74915         | ATP6V1E2        | 90423         | Transporter          |
| <b>Atp6v1f</b>  | <b>ATPase, H+ transporting, lysosomal V1 subunit F</b>                       | <b>66144</b>  | <b>ATP6V1F</b>  | <b>9296</b>   | <b>Transporter</b>   |
| <b>Atp6v1g1</b> | <b>ATPase, H+ transporting, lysosomal V1 subunit G1</b>                      | <b>66290</b>  | <b>ATP6V1G1</b> | <b>9550</b>   | <b>Transporter</b>   |
| Atp6v1g2        | ATPase, H+ transporting, lysosomal V1 subunit G2                             | 66237         | ATP6V1G2        | 534           | Transporter          |
| Atp6v1g3        | ATPase, H+ transporting, lysosomal V1 subunit G3                             | 338375        | ATP6V1G3        | 127124        | Transporter          |
| <b>Atp6v1h</b>  | <b>ATPase, H+ transporting, lysosomal V1 subunit H</b>                       | <b>108664</b> | <b>ATP6V1H</b>  | <b>51606</b>  | <b>Transporter</b>   |
| Atp7a           | ATPase, Cu <sup>2+</sup> transporting, α polypeptide                         | 11977         | ATP7A           | 538           | Transporter          |
| Atp7b           | ATPase, Cu <sup>2+</sup> transporting, β polypeptide                         | 11979         | ATP7B           | 540           | Transporter          |
| Cldn16          | Claudin 16                                                                   | 114141        | CLDN16          | 10686         | Transporter          |
| Cnm1            | Cyclin M1                                                                    | 83674         | CNNM1           | 26507         | Transporter          |
| Cnm2            | Cyclin M2                                                                    | 94219         | CNNM2           | 54805         | Transporter          |
| <b>Cnm3</b>     | <b>Cyclin M3</b>                                                             | <b>94218</b>  | <b>CNNM3</b>    | <b>26505</b>  | <b>Transporter</b>   |
| Cnm4            | Cyclin M4                                                                    | 94220         | CNNM4           | 26504         | Transporter          |
| <b>Cutc</b>     | <b>CutC copper transporter</b>                                               | <b>66388</b>  | <b>CUTC</b>     | <b>51076</b>  | <b>Transporter</b>   |
| <b>Letm1</b>    | <b>Leucine zipper-EF-hand containing transmembrane protein 1</b>             | <b>56384</b>  | <b>LETM1</b>    | <b>3954</b>   | <b>Transporter</b>   |
| <b>Magt1</b>    | <b>Mg<sup>2+</sup> transporter 1</b>                                         | <b>67075</b>  | <b>MAGT1</b>    | <b>84061</b>  | <b>Transporter</b>   |
| <b>Mcu</b>      | <b>Mitochondrial Ca<sup>2+</sup> uniporter</b>                               | <b>215999</b> | <b>MCU</b>      | <b>90550</b>  | <b>Transporter</b>   |
| <b>Mfsd5</b>    | <b>Major facilitator superfamily domain containing 5</b>                     | <b>106073</b> | <b>MFSD5</b>    | <b>84975</b>  | <b>Transporter</b>   |
| <b>Mfsd8</b>    | <b>Major facilitator superfamily domain containing 8</b>                     | <b>72175</b>  | <b>MFSD8</b>    | <b>256471</b> | <b>Transporter</b>   |
| Mlc1            | Megalencephalic leukoencephalopathy with subcortical cysts 1 homolog (human) | 170790        | MLC1            | 23209         | Transporter          |
| <b>Mmgt1</b>    | <b>Membrane Mg<sup>2+</sup> transporter 1</b>                                | <b>236792</b> | <b>MMGT1</b>    | <b>93380</b>  | <b>Transporter</b>   |
| <b>Mrs2</b>     | <b>MRS2 Mg<sup>2+</sup> transporter</b>                                      | <b>380836</b> | <b>MRS2</b>     | <b>57380</b>  | <b>Transporter</b>   |
| <b>Mtch1</b>    | <b>Mitochondrial carrier 1</b>                                               | <b>56462</b>  | <b>MTCH1</b>    | <b>23787</b>  | <b>Transporter</b>   |
| <b>Mtch2</b>    | <b>Mitochondrial carrier 2</b>                                               | <b>56428</b>  | <b>MTCH2</b>    | <b>23788</b>  | <b>Transporter</b>   |
| Nipa1           | Non imprinted in Prader-Willi/Angelman syndrome 1 homolog (human)            | 233280        | NIPA1           | 123606        | Transporter          |
| <b>Nipa2</b>    | <b>Non imprinted in Prader-Willi/Angelman syndrome 2 homolog (human)</b>     | <b>93790</b>  | <b>NIPA2</b>    | <b>81614</b>  | <b>Transporter</b>   |
| Nipal1          | NIPA-like domain containing 1                                                | 70701         | NIPAL1          | 152519        | Transporter          |
| Nipal2          | NIPA-like domain containing 2                                                | 223473        | NIPAL2          | 79815         | Transporter          |

| Mm Gene        | Mm Full Name                                                                                     | Mm Gene ID    | Hs Gene        | Hs Gene ID   | Functional category* |
|----------------|--------------------------------------------------------------------------------------------------|---------------|----------------|--------------|----------------------|
| <b>Nipal3</b>  | <b>NIPA-like domain containing 3</b>                                                             | <b>74552</b>  | <b>NIPAL3</b>  | <b>57185</b> | <b>Transporter</b>   |
| Nipal4         | NIPA-like domain containing 4                                                                    | 214112        | NIPAL4         | 348938       | Transporter          |
| Rhag           | Rhesus blood group-associated A glycoprotein                                                     | 19743         | RHAG           | 6005         | Transporter          |
| Rhbg           | Rhesus blood group-associated B glycoprotein                                                     | 58176         | RHBG           | 57127        | Transporter          |
| Rhcg           | Rhesus blood group-associated C glycoprotein                                                     | 56315         | RHCG           | 51458        | Transporter          |
| Rhd            | Rh blood group, D antigen                                                                        | 19746         | RHCE   RHD     | 6006   6007  | Transporter          |
| <b>Sfxn1</b>   | <b>Sideroflexin 1</b>                                                                            | <b>14057</b>  | <b>SFXN1</b>   | <b>94081</b> | <b>Transporter</b>   |
| Sfxn2          | Sideroflexin 2                                                                                   | 94279         | SFXN2          | 118980       | Transporter          |
| <b>Sfxn3</b>   | <b>Sideroflexin 3</b>                                                                            | <b>94280</b>  | <b>SFXN3</b>   | <b>81855</b> | <b>Transporter</b>   |
| Sfxn4          | Sideroflexin 4                                                                                   | 94281         | SFXN4          | 119559       | Transporter          |
| Sfxn5          | Sideroflexin 5                                                                                   | 94282         | SFXN5          | 94097        | Transporter          |
| Slc10a5        | Solute carrier family 10 (Na <sup>+</sup> /bile acid cotransporter family), member 5             | 241877        | SLC10A5        | 347051       | Transporter          |
| Slc11a1        | Solute carrier family 11 (proton-coupled divalent metal ion transporters), member 1              | 18173         | SLC11A1        | 6556         | Transporter          |
| <b>Slc11a2</b> | <b>Solute carrier family 11 (proton-coupled divalent metal ion transporters), member 2</b>       | <b>18174</b>  | <b>SLC11A2</b> | <b>4891</b>  | <b>Transporter</b>   |
| Slc12a1        | Solute carrier family 12, member 1                                                               | 20495         | SLC12A1        | 6557         | Transporter          |
| Slc12a2        | Solute carrier family 12, member 2                                                               | 20496         | SLC12A2        | 6558         | Transporter          |
| Slc12a3        | Solute carrier family 12, member 3                                                               | 20497         | SLC12A3        | 6559         | Transporter          |
| Slc12a4        | Solute carrier family 12, member 4                                                               | 20498         | SLC12A4        | 6560         | Transporter          |
| Slc12a5        | Solute carrier family 12, member 5                                                               | 57138         | SLC12A5        | 57468        | Transporter          |
| <b>Slc12a6</b> | <b>Solute carrier family 12, member 6</b>                                                        | <b>107723</b> | <b>SLC12A6</b> | <b>9990</b>  | <b>Transporter</b>   |
| <b>Slc12a7</b> | <b>Solute carrier family 12, member 7</b>                                                        | <b>20499</b>  | <b>SLC12A7</b> | <b>10723</b> | <b>Transporter</b>   |
| Slc12a8        | Solute carrier family 12 (K <sup>+</sup> /chloride transporters), member 8                       | 171286        | SLC12A8        | 84561        | Transporter          |
| <b>Slc12a9</b> | <b>Solute carrier family 12 (K<sup>+</sup>/chloride transporters), member 9</b>                  | <b>83704</b>  | <b>SLC12A9</b> | <b>56996</b> | <b>Transporter</b>   |
| Slc13a1        | Solute carrier family 13 (Na <sup>+</sup> /sulfate symporters), member 1                         | 55961         | SLC13A1        | 6561         | Transporter          |
| Slc13a2        | Solute carrier family 13 (Na <sup>+</sup> -dependent dicarboxylate transporter), member 2        | 20500         | SLC13A2        | 9058         | Transporter          |
| Slc13a3        | Solute carrier family 13 (Na <sup>+</sup> -dependent dicarboxylate transporter), member 3        | 114644        | SLC13A3        | 64849        | Transporter          |
| Slc13a4        | Solute carrier family 13 (Na <sup>+</sup> /sulfate symporters), member 4                         | 243755        | SLC13A4        | 26266        | Transporter          |
| Slc13a5        | Solute carrier family 13 (Na <sup>+</sup> -dependent citrate transporter), member 5              | 237831        | SLC13A5        | 284111       | Transporter          |
| Slc17a1        | Solute carrier family 17 (Na <sup>+</sup> phosphate), member 1                                   | 20504         | SLC17A1        | 6568         | Transporter          |
| Slc17a2        | Solute carrier family 17 (Na <sup>+</sup> phosphate), member 2                                   | 218103        | SLC17A2        | 10246        | Transporter          |
| Slc17a3        | Solute carrier family 17 (Na <sup>+</sup> phosphate), member 3                                   | 105355        | SLC17A3        | 10786        | Transporter          |
| Slc17a4        | Solute carrier family 17 (Na <sup>+</sup> phosphate), member 4                                   | 319848        | SLC17A4        | 10050        | Transporter          |
| Slc1a4         | Solute carrier family 1 (glutamate/neutral amino acid transporter), member 4                     | 55963         | SLC1A4         | 6509         | Transporter          |
| <b>Slc20a1</b> | <b>Solute carrier family 20, member 1</b>                                                        | <b>20515</b>  | <b>SLC20A1</b> | <b>6574</b>  | <b>Transporter</b>   |
| <b>Slc20a2</b> | <b>Solute carrier family 20, member 2</b>                                                        | <b>20516</b>  | <b>SLC20A2</b> | <b>6575</b>  | <b>Transporter</b>   |
| Slc22a23       | Solute carrier family 22, member 23                                                              | 73102         | SLC22A23       | 63027        | Transporter          |
| Slc24a1        | Solute carrier family 24 (Na <sup>+</sup> /K <sup>+</sup> /Ca <sup>2+</sup> exchanger), member 1 | 214111        | SLC24A1        | 9187         | Transporter          |
| Slc24a2        | Solute carrier family 24 (Na <sup>+</sup> /K <sup>+</sup> /Ca <sup>2+</sup> exchanger), member 2 | 76376         | SLC24A2        | 25769        | Transporter          |
| Slc24a3        | Solute carrier family 24 (Na <sup>+</sup> /K <sup>+</sup> /Ca <sup>2+</sup> exchanger), member 3 | 94249         | SLC24A3        | 57419        | Transporter          |

| Mm Gene         | Mm Full Name                                                                                     | Mm Gene ID    | Hs Gene         | Hs Gene ID    | Functional category* |
|-----------------|--------------------------------------------------------------------------------------------------|---------------|-----------------|---------------|----------------------|
| Slc24a4         | Solute carrier family 24 (Na <sup>+</sup> /K <sup>+</sup> /Ca <sup>2+</sup> exchanger), member 4 | 238384        | SLC24A4         | 123041        | Transporter          |
| Slc24a5         | Solute carrier family 24, member 5                                                               | 317750        | SLC24A5         | 283652        | Transporter          |
| <b>Slc25a14</b> | <b>Solute carrier family 25 (mitochondrial carrier, brain), member 14</b>                        | <b>20523</b>  | <b>SLC25A14</b> | <b>9016</b>   | <b>Transporter</b>   |
| <b>Slc25a23</b> | <b>Solute carrier family 25 (mitochondrial carrier; phosphate carrier), member 23</b>            | <b>66972</b>  | <b>SLC25A23</b> | <b>79085</b>  | <b>Transporter</b>   |
| <b>Slc25a24</b> | <b>Solute carrier family 25 (mitochondrial carrier, phosphate carrier), member 24</b>            | <b>229731</b> | <b>SLC25A24</b> | <b>29957</b>  | <b>Transporter</b>   |
| <b>Slc25a25</b> | <b>Solute carrier family 25 (mitochondrial carrier, phosphate carrier), member 25</b>            | <b>227731</b> | <b>SLC25A25</b> | <b>114789</b> | <b>Transporter</b>   |
| Slc25a27        | Solute carrier family 25, member 27                                                              | 74011         | SLC25A27        | 9481          | Transporter          |
| <b>Slc25a28</b> | <b>Solute carrier family 25, member 28</b>                                                       | <b>246696</b> | <b>SLC25A28</b> | <b>81894</b>  | <b>Transporter</b>   |
| <b>Slc25a3</b>  | <b>Solute carrier family 25 (mitochondrial carrier, phosphate carrier), member 3</b>             | <b>18674</b>  | <b>SLC25A3</b>  | <b>5250</b>   | <b>Transporter</b>   |
| <b>Slc25a37</b> | <b>Solute carrier family 25, member 37</b>                                                       | <b>67712</b>  | <b>SLC25A37</b> | <b>51312</b>  | <b>Transporter</b>   |
| Slc26a1         | Solute carrier family 26 (sulfate transporter), member 1                                         | 231583        | SLC26A1         | 10861         | Transporter          |
| Slc26a10        | Solute carrier family 26, member 10                                                              | 216441        | SLC26A10        | 65012         | Transporter          |
| Slc26a11        | Solute carrier family 26, member 11                                                              | 268512        | SLC26A11        | 284129        | Transporter          |
| <b>Slc26a2</b>  | <b>Solute carrier family 26 (sulfate transporter), member 2</b>                                  | <b>13521</b>  | <b>SLC26A2</b>  | <b>1836</b>   | <b>Transporter</b>   |
| Slc26a3         | Solute carrier family 26, member 3                                                               | 13487         | SLC26A3         | 1811          | Transporter          |
| Slc26a4         | Solute carrier family 26, member 4                                                               | 23985         | SLC26A4         | 5172          | Transporter          |
| Slc26a5         | Solute carrier family 26, member 5                                                               | 80979         | SLC26A5         | 375611        | Transporter          |
| Slc26a6         | Solute carrier family 26, member 6                                                               | 171429        | SLC26A6         | 65010         | Transporter          |
| Slc26a7         | Solute carrier family 26, member 7                                                               | 208890        | SLC26A7         | 115111        | Transporter          |
| Slc26a8         | Solute carrier family 26, member 8                                                               | 224661        | SLC26A8         | 116369        | Transporter          |
| Slc26a9         | Solute carrier family 26, member 9                                                               | 320718        | SLC26A9         | 115019        | Transporter          |
| Slc30a1         | Solute carrier family 30 (zinc transporter), member 1                                            | 22782         | SLC30A1         | 7779          | Transporter          |
| Slc30a10        | Solute carrier family 30, member 10                                                              | 226781        | SLC30A10        | 55532         | Transporter          |
| Slc30a2         | Solute carrier family 30 (zinc transporter), member 2                                            | 230810        | SLC30A2         | 7780          | Transporter          |
| Slc30a3         | Solute carrier family 30 (zinc transporter), member 3                                            | 22784         | SLC30A3         | 7781          | Transporter          |
| Slc30a4         | Solute carrier family 30 (zinc transporter), member 4                                            | 22785         | SLC30A4         | 7782          | Transporter          |
| <b>Slc30a5</b>  | <b>Solute carrier family 30 (zinc transporter), member 5</b>                                     | <b>69048</b>  | <b>SLC30A5</b>  | <b>64924</b>  | <b>Transporter</b>   |
| <b>Slc30a6</b>  | <b>Solute carrier family 30 (zinc transporter), member 6</b>                                     | <b>210148</b> | <b>SLC30A6</b>  | <b>55676</b>  | <b>Transporter</b>   |
| <b>Slc30a7</b>  | <b>Solute carrier family 30 (zinc transporter), member 7</b>                                     | <b>66500</b>  | <b>SLC30A7</b>  | <b>148867</b> | <b>Transporter</b>   |
| Slc30a8         | Solute carrier family 30 (zinc transporter), member 8                                            | 239436        | SLC30A8         | 169026        | Transporter          |
| <b>Slc30a9</b>  | <b>Solute carrier family 30 (zinc transporter), member 9</b>                                     | <b>109108</b> | <b>SLC30A9</b>  | <b>10463</b>  | <b>Transporter</b>   |
| Slc31a1         | Solute carrier family 31, member 1                                                               | 20529         | SLC31A1         | 1317          | Transporter          |
| Slc31a2         | Solute carrier family 31, member 2                                                               | 20530         | SLC31A2         | 1318          | Transporter          |
| Slc34a1         | Solute carrier family 34 (Na <sup>+</sup> phosphate), member 1                                   | 20505         | SLC34A1         | 6569          | Transporter          |
| Slc34a2         | Solute carrier family 34 (Na <sup>+</sup> phosphate), member 2                                   | 20531         | SLC34A2         | 10568         | Transporter          |
| Slc34a3         | Solute carrier family 34 (Na <sup>+</sup> phosphate), member 3                                   | 142681        | SLC34A3         | 142680        | Transporter          |
| Slc35g1         | Solute carrier family 35, member G1                                                              | 240660        | SLC35G1         | 159371        | Transporter          |
| Slc35g2         | Solute carrier family 35, member G2                                                              | 245020        | SLC35G2         | 80723         | Transporter          |
| Slc35g3         | Solute carrier family 35, member G3                                                              | 56293         | SLC35G3         | 146861        | Transporter          |
| Slc39a1         | Solute carrier family 39 (zinc transporter), member 1                                            | 30791         | SLC39A1         | 27173         | Transporter          |
| <b>Slc39a10</b> | <b>Solute carrier family 39 (zinc transporter), member 10</b>                                    | <b>227059</b> | <b>SLC39A10</b> | <b>57181</b>  | <b>Transporter</b>   |
| Slc39a11        | Solute carrier family 39 (metal ion transporter), member 11                                      | 69806         | SLC39A11        | 201266        | Transporter          |
| Slc39a12        | Solute carrier family 39 (zinc transporter), member 12                                           | 277468        | SLC39A12        | 221074        | Transporter          |
| <b>Slc39a13</b> | <b>Solute carrier family 39 (metal ion transporter), member 13</b>                               | <b>68427</b>  | <b>SLC39A13</b> | <b>91252</b>  | <b>Transporter</b>   |

| <b>Mm Gene</b> | <b>Mm Full Name</b>                                                                      | <b>Mm Gene ID</b> | <b>Hs Gene</b> | <b>Hs Gene ID</b> | <b>Functional category*</b> |
|----------------|------------------------------------------------------------------------------------------|-------------------|----------------|-------------------|-----------------------------|
| Slc39a14       | Solute carrier family 39 (zinc transporter), member 14                                   | 213053            | SLC39A14       | 23516             | Transporter                 |
| Slc39a2        | Solute carrier family 39 (zinc transporter), member 2                                    | 214922            | SLC39A2        | 29986             | Transporter                 |
| Slc39a3        | Solute carrier family 39 (zinc transporter), member 3                                    | 106947            | SLC39A3        | 29985             | Transporter                 |
| Slc39a4        | Solute carrier family 39 (zinc transporter), member 4                                    | 72027             | SLC39A4        | 55630             | Transporter                 |
| Slc39a5        | Solute carrier family 39 (metal ion transporter), member 5                               | 72002             | SLC39A5        | 283375            | Transporter                 |
| <b>Slc39a6</b> | <b>Solute carrier family 39 (metal ion transporter), member 6</b>                        | <b>106957</b>     | <b>SLC39A6</b> | <b>25800</b>      | <b>Transporter</b>          |
| <b>Slc39a7</b> | <b>Solute carrier family 39 (zinc transporter), member 7</b>                             | <b>14977</b>      | <b>SLC39A7</b> | <b>7922</b>       | <b>Transporter</b>          |
| Slc39a8        | Solute carrier family 39 (metal ion transporter), member 8                               | 67547             | SLC39A8        | 64116             | Transporter                 |
| <b>Slc39a9</b> | <b>Solute carrier family 39 (zinc transporter), member 9</b>                             | <b>328133</b>     | <b>SLC39A9</b> | <b>55334</b>      | <b>Transporter</b>          |
| Slc40a1        | Solute carrier family 40 (iron-regulated transporter), member 1                          | 53945             | SLC40A1        | 30061             | Transporter                 |
| <b>Slc41a1</b> | <b>Solute carrier family 41, member 1</b>                                                | <b>98396</b>      | <b>SLC41A1</b> | <b>254428</b>     | <b>Transporter</b>          |
| Slc41a2        | Solute carrier family 41, member 2                                                       | 338365            | SLC41A2        | 84102             | Transporter                 |
| <b>Slc41a3</b> | <b>Solute carrier family 41, member 3</b>                                                | <b>71699</b>      | <b>SLC41A3</b> | <b>54946</b>      | <b>Transporter</b>          |
| Slc4a1         | Solute carrier family 4 (anion exchanger), member 1                                      | 20533             | SLC4A1         | 6521              | Transporter                 |
| Slc4a10        | Solute carrier family 4, Na <sup>+</sup> bicarbonate cotransporter-like, member 10       | 94229             | SLC4A10        | 57282             | Transporter                 |
| Slc4a11        | Solute carrier family 4, Na <sup>+</sup> bicarbonate transporter-like, member 11         | 269356            | SLC4A11        | 83959             | Transporter                 |
| Slc4a2         | Solute carrier family 4 (anion exchanger), member 2                                      | 20535             | SLC4A2         | 6522              | Transporter                 |
| Slc4a3         | Solute carrier family 4 (anion exchanger), member 3                                      | 20536             | SLC4A3         | 6508              | Transporter                 |
| Slc4a4         | Solute carrier family 4 (anion exchanger), member 4                                      | 54403             | SLC4A4         | 8671              | Transporter                 |
| Slc4a5         | Solute carrier family 4, Na <sup>+</sup> bicarbonate cotransporter, member 5             | 232156            | SLC4A5         | 57835             | Transporter                 |
| <b>Slc4a7</b>  | <b>Solute carrier family 4, Na<sup>+</sup> bicarbonate cotransporter, member 7</b>       | <b>218756</b>     | <b>SLC4A7</b>  | <b>9497</b>       | <b>Transporter</b>          |
| Slc4a8         | Solute carrier family 4 (anion exchanger), member 8                                      | 59033             | SLC4A8         | 9498              | Transporter                 |
| Slc4a9         | Solute carrier family 4, Na <sup>+</sup> bicarbonate cotransporter, member 9             | 240215            | SLC4A9         | 83697             | Transporter                 |
| Slc5a11        | Solute carrier family 5 (Na <sup>+</sup> /glucose cotransporter), member 11              | 233836            | SLC5A11        | 115584            | Transporter                 |
| Slc5a12        | Solute carrier family 5 (Na <sup>+</sup> /glucose cotransporter), member 12              | 241612            | SLC5A12        | 159963            | Transporter                 |
| <b>Slc5a3</b>  | <b>Solute carrier family 5 (inositol transporters), member 3</b>                         | <b>53881</b>      | <b>SLC5A3</b>  | <b>6526</b>       | <b>Transporter</b>          |
| Slc5a4a        | Solute carrier family 5, member 4a                                                       | 64452             | SLC5A4         | 6527              | Transporter                 |
| Slc5a5         | Solute carrier family 5 (Na <sup>+</sup> iodide symporter), member 5                     | 114479            | SLC5A5         | 6528              | Transporter                 |
| Slc5a6         | Solute carrier family 5 (Na <sup>+</sup> -dependent vitamin transporter), member 6       | 330064            | SLC5A6         | 8884              | Transporter                 |
| Slc5a8         | Solute carrier family 5 (iodide transporter), member 8                                   | 216225            | SLC5A8         | 160728            | Transporter                 |
| Slc8a1         | Solute carrier family 8 (Na <sup>+</sup> /Ca <sup>2+</sup> exchanger), member 1          | 20541             | SLC8A1         | 6546              | Transporter                 |
| Slc8a2         | Solute carrier family 8 (Na <sup>+</sup> /Ca <sup>2+</sup> exchanger), member 2          | 110891            | SLC8A2         | 6543              | Transporter                 |
| Slc8a3         | Solute carrier family 8 (Na <sup>+</sup> /Ca <sup>2+</sup> exchanger), member 3          | 110893            | SLC8A3         | 6547              | Transporter                 |
| Slc8b1         | Solute carrier family 8 (Na <sup>+</sup> /lithium/Ca <sup>2+</sup> exchanger), member B1 | 170756            | SLC8B1         | 80024             | Transporter                 |
| <b>Slc9a1</b>  | <b>Solute carrier family 9 (Na<sup>+</sup>/H<sup>+</sup> exchanger), member 1</b>        | <b>20544</b>      | <b>SLC9A1</b>  | <b>6548</b>       | <b>Transporter</b>          |
| Slc9a2         | Solute carrier family 9 (Na <sup>+</sup> /H <sup>+</sup> exchanger), member 2            | 226999            | SLC9A2         | 6549              | Transporter                 |
| Slc9a3         | Solute carrier family 9 (Na <sup>+</sup> /H <sup>+</sup> exchanger), member 3            | 105243            | SLC9A3         | 6550              | Transporter                 |
| Slc9a4         | Solute carrier family 9 (Na <sup>+</sup> /H <sup>+</sup> exchanger), member 4            | 110895            | SLC9A4         | 389015            | Transporter                 |
| Slc9a5         | Solute carrier family 9 (Na <sup>+</sup> /H <sup>+</sup> exchanger), member 5            | 277973            | SLC9A5         | 6553              | Transporter                 |
| Slc9a6         | Solute carrier family 9 (Na <sup>+</sup> /H <sup>+</sup> exchanger), member 6            | 236794            | SLC9A6         | 10479             | Transporter                 |
| Slc9a7         | Solute carrier family 9 (Na <sup>+</sup> /H <sup>+</sup> exchanger), member 7            | 236727            | SLC9A7         | 84679             | Transporter                 |
| <b>Slc9a8</b>  | <b>Solute carrier family 9 (Na<sup>+</sup>/H<sup>+</sup> exchanger), member 8</b>        | <b>77031</b>      | <b>SLC9A8</b>  | <b>23315</b>      | <b>Transporter</b>          |



| Mm Gene        | Mm Full Name                                                                                                 | Mm Gene ID    | Hs Gene        | Hs Gene ID    | Functional category* |
|----------------|--------------------------------------------------------------------------------------------------------------|---------------|----------------|---------------|----------------------|
| <b>Slc9a9</b>  | <b>Solute carrier family 9 (Na<sup>+</sup>/H<sup>+</sup> exchanger), member 9</b>                            | <b>331004</b> | <b>SLC9A9</b>  | <b>285195</b> | <b>Transporter</b>   |
| Slc9b1         | Solute carrier family 9, subfamily B (NHA1, cation proton antiporter 1), member 1                            | 74446         | SLC9B1         | 150159        | Transporter          |
| Slc9b2         | Solute carrier family 9, subfamily B (NHA2, cation proton antiporter 2), member 2                            | 97086         | SLC9B2         | 133308        | Transporter          |
| Slc9c1         | Solute carrier family 9, subfamily C (Na <sup>+</sup> -transporting carboxylic acid decarboxylase), member 1 | 208169        | SLC9C1         | 285335        | Transporter          |
| Svop           | SV2 related protein                                                                                          | 68666         | SVOP           | 55530         | Transporter          |
| <b>Tcirg1</b>  | <b>T cell, immune regulator 1, ATPase, H<sup>+</sup> transporting, lysosomal V0 protein A3</b>               | <b>27060</b>  | <b>TCIRG1</b>  | <b>10312</b>  | <b>Transporter</b>   |
| Tfr2           | Transferrin receptor 2                                                                                       | 50765         | TFR2           | 7036          | Transporter          |
| <b>Tfrc</b>    | <b>Transferrin receptor</b>                                                                                  | <b>22042</b>  | <b>TFRC</b>    | <b>7037</b>   | <b>Transporter</b>   |
| Tmco3          | Transmembrane and coiled-coil domains 3                                                                      | 234076        | TMCO3          | 55002         | Transporter          |
| <b>Tmem165</b> | <b>Transmembrane protein 165</b>                                                                             | <b>21982</b>  | <b>TMEM165</b> | <b>55858</b>  | <b>Transporter</b>   |
| <b>Tusc3</b>   | <b>Tumor suppressor candidate 3</b>                                                                          | <b>80286</b>  | <b>TUSC3</b>   | <b>7991</b>   | <b>Transporter</b>   |
| Ucp1           | Uncoupling protein 1 (mitochondrial, proton carrier)                                                         | 22227         | UCP1           | 7350          | Transporter          |
| <b>Ucp2</b>    | <b>Uncoupling protein 2 (mitochondrial, proton carrier)</b>                                                  | <b>22228</b>  | <b>UCP2</b>    | <b>7351</b>   | <b>Transporter</b>   |
| Ucp3           | Uncoupling protein 3 (mitochondrial, proton carrier)                                                         | 22229         | UCP3           | 7352          | Transporter          |
| Wfs1           | Wolframin ER transmembrane glycoprotein                                                                      | 22393         | WFS1           | 7466          | Transporter          |
| <b>Xpr1</b>    | <b>Xenotropic and polytropic retrovirus receptor 1</b>                                                       | <b>19775</b>  | <b>XPR1</b>    | <b>9213</b>   | <b>Transporter</b>   |
| <b>Zdhhc13</b> | <b>Zinc finger, DHHC domain containing 13</b>                                                                | <b>243983</b> | <b>ZDHHC13</b> | <b>54503</b>  | <b>Transporter</b>   |
| <b>Zdhhc17</b> | <b>Zinc finger, DHHC domain containing 17</b>                                                                | <b>320150</b> | <b>ZDHHC17</b> | <b>23390</b>  | <b>Transporter</b>   |
|                |                                                                                                              |               |                |               |                      |
| <b>Ahcy1</b>   | <b>S-adenosylhomocysteine hydrolase-like 1</b>                                                               | <b>229709</b> | <b>AHCYL1</b>  | <b>10768</b>  | <b>ICT Regulator</b> |
| <b>Ahcy2</b>   | <b>S-adenosylhomocysteine hydrolase-like 2</b>                                                               | <b>74340</b>  | <b>AHCYL2</b>  | <b>23382</b>  | <b>ICT Regulator</b> |
| Akap7          | A kinase (PRKA) anchor protein 7                                                                             | 432442        | AKAP7          | 9465          | ICT Regulator        |
| Amigo1         | Adhesion molecule with Ig like domain 1                                                                      | 229715        | AMIGO1         | 57463         | ICT Regulator        |
| Ank            | Progressive ankylosis                                                                                        | 11732         | ANKH           | 56172         | ICT Regulator        |
| Ank2           | Ankyrin 2, brain                                                                                             | 109676        | ANK2           | 287           | ICT Regulator        |
| Ank3           | Ankyrin 3, epithelial                                                                                        | 11735         | ANK3           | 288           | ICT Regulator        |
| <b>Anxa6</b>   | <b>Annexin A6</b>                                                                                            | <b>11749</b>  | <b>ANXA6</b>   | <b>309</b>    | <b>ICT Regulator</b> |
| Asph           | Aspartate- $\beta$ -hydroxylase                                                                              | 65973         | ASPH           | 444           | ICT Regulator        |
| <b>Atox1</b>   | <b>Antioxidant 1 copper chaperone</b>                                                                        | <b>11927</b>  | <b>ATOX1</b>   | <b>475</b>    | <b>ICT Regulator</b> |
| Bpifa1         | BPI fold containing family A, member 1                                                                       | 18843         | BPIFA1         | 51297         | ICT Regulator        |
| Bspry          | B-box and SPRY domain containing                                                                             | 192120        | BSPRY          | 54836         | ICT Regulator        |
| Cabp1          | Ca <sup>2+</sup> binding protein 1                                                                           | 29867         | CABP1          | 9478          | ICT Regulator        |
| Cabp2          | Ca <sup>2+</sup> binding protein 2                                                                           | 29866         | CABP2          | 51475         | ICT Regulator        |
| Cabp4          | Ca <sup>2+</sup> binding protein 4                                                                           | 73660         | CABP4          | 57010         | ICT Regulator        |
| Cabp5          | Ca <sup>2+</sup> binding protein 5                                                                           | 29865         | CABP5          | 56344         | ICT Regulator        |
| Cachd1         | Cache domain containing 1                                                                                    | 320508        | CACHD1         | 57685         | ICT Regulator        |
| Casq1          | Calsequestrin 1                                                                                              | 12372         | CASQ1          | 844           | ICT Regulator        |
| Casq2          | Calsequestrin 2                                                                                              | 12373         | CASQ2          | 845           | ICT Regulator        |
| Cbarp          | Ca <sup>2+</sup> channel, voltage-dependent, $\beta$ subunit associated regulatory protein                   | 100503659     | CBARP          | 255057        | ICT Regulator        |
| <b>Ccdc115</b> | <b>Coiled-coil domain containing 115</b>                                                                     | <b>69668</b>  | <b>CCDC115</b> | <b>84317</b>  | <b>ICT Regulator</b> |
| Cltn           | Collectrin, amino acid transport regulator                                                                   | 57394         | CLTRN          | 57393         | ICT Regulator        |
| Cnksr3         | Cnksr family member 3                                                                                        | 215748        | CNKS3          | 154043        | ICT Regulator        |
| <b>Commd3</b>  | <b>COMM domain containing 3</b>                                                                              | <b>12238</b>  | <b>COMMD3</b>  | <b>23412</b>  | <b>ICT Regulator</b> |
| <b>Commd9</b>  | <b>COMM domain containing 9</b>                                                                              | <b>76501</b>  | <b>COMMD9</b>  | <b>29099</b>  | <b>ICT Regulator</b> |
| <b>Cracr2a</b> | <b>Ca<sup>2+</sup> release activated channel regulator 2A</b>                                                | <b>381812</b> | <b>CRACR2A</b> | <b>84766</b>  | <b>ICT Regulator</b> |
| Cracr2b        | Ca <sup>2+</sup> release activated channel regulator 2B                                                      | 213573        | CRACR2B        | 283229        | ICT Regulator        |

| <b>Mm Gene</b> | <b>Mm Full Name</b>                                                             | <b>Mm Gene ID</b> | <b>Hs Gene</b> | <b>Hs Gene ID</b> | <b>Functional category*</b> |
|----------------|---------------------------------------------------------------------------------|-------------------|----------------|-------------------|-----------------------------|
| <b>Crbn</b>    | <b>Cereblon</b>                                                                 | <b>58799</b>      | <b>CRBN</b>    | <b>51185</b>      | <b>ICT Regulator</b>        |
| Crisp2         | Cysteine-rich secretory protein 2                                               | 22024             | CRISP2         | 7180              | ICT Regulator               |
| Dennd5a        | DENN/MADD domain containing 5A                                                  | 19347             | DENND5A        | 23258             | ICT Regulator               |
| Dennd5b        | DENN/MADD domain containing 5B                                                  | 320560            | DENND5B        | 160518            | ICT Regulator               |
| <b>Dlg1</b>    | <b>Discs large MAGUK scaffold protein 1</b>                                     | <b>13383</b>      | <b>DLG1</b>    | <b>1739</b>       | <b>ICT Regulator</b>        |
| Dlg4           | Discs large MAGUK scaffold protein 4                                            | 13385             | DLG4           | 1742              | ICT Regulator               |
| <b>Dmac2l</b>  | <b>Distal membrane arm assembly complex 2 like</b>                              | <b>68055</b>      | <b>DMAC2L</b>  | <b>27109</b>      | <b>ICT Regulator</b>        |
| Dpp10          | Dipeptidylpeptidase 10                                                          | 269109            | DPP10          | 57628             | ICT regulator               |
| Dpp6           | Dipeptidylpeptidase 6                                                           | 13483             | DPP6           | 1804              | ICT regulator               |
| Efhb           | EF hand domain family, member B                                                 | 211482            | EFHB           | 151651            | ICT Regulator               |
| Efhc1          | EF-hand domain (C-terminal) containing 1                                        | 71877             | EFHC1          | 114327            | ICT Regulator               |
| Enkur          | Enkurin, TRPC channel interacting protein                                       | 71233             | ENKUR          | 219670            | ICT Regulator               |
| <b>Erp44</b>   | <b>Endoplasmic reticulum protein 44</b>                                         | <b>76299</b>      | <b>ERP44</b>   | <b>23071</b>      | <b>ICT Regulator</b>        |
| Fxyd1          | FXYD domain-containing ion transport regulator 1                                | 56188             | FXYD1          | 5348              | ICT Regulator               |
| Fxyd2          | FXYD domain-containing ion transport regulator 2                                | 11936             | FXYD2          | 486               | ICT Regulator               |
| Fxyd3          | FXYD domain-containing ion transport regulator 3                                | 17178             | FXYD3          | 5349              | ICT Regulator               |
| Fxyd4          | FXYD domain-containing ion transport regulator 4                                | 108017            | FXYD4          | 53828             | ICT Regulator               |
| <b>Fxyd5</b>   | <b>FXYD domain-containing ion transport regulator 5</b>                         | <b>18301</b>      | <b>FXYD5</b>   | <b>53827</b>      | <b>ICT Regulator</b>        |
| Fxyd6          | FXYD domain-containing ion transport regulator 6                                | 59095             | FXYD6          | 53826             | ICT Regulator               |
| <b>Fxyd7</b>   | <b>FXYD domain-containing ion transport regulator 7</b>                         | <b>57780</b>      | <b>FXYD7</b>   | <b>53822</b>      | <b>ICT Regulator</b>        |
| <b>Gopc</b>    | <b>Golgi associated PDZ and coiled-coil motif containing</b>                    | <b>94221</b>      | <b>GOPC</b>    | <b>57120</b>      | <b>ICT Regulator</b>        |
| <b>Gpd1l</b>   | <b>Glycerol-3-phosphate dehydrogenase 1-like</b>                                | <b>333433</b>     | <b>GPD1L</b>   | <b>23171</b>      | <b>ICT Regulator</b>        |
| <b>Hax1</b>    | <b>HCLS1 associated X-1</b>                                                     | <b>23897</b>      | <b>HAX1</b>    | <b>10456</b>      | <b>ICT Regulator</b>        |
| Hpca           | Hippocalcin                                                                     | 15444             | HPCA           | 3208              | ICT Regulator               |
| Hrc            | Histidine rich Ca <sup>2+</sup> binding protein                                 | 15464             | HRC            | 3270              | ICT Regulator               |
| Jph2           | Junctophilin 2                                                                  | 59091             | JPH2           | 57158             | ICT Regulator               |
| Jsrp1          | Junctional sarcoplasmic reticulum protein 1                                     | 71912             | JSRP1          | 126306            | ICT Regulator               |
| Kcnrg          | K <sup>+</sup> channel regulator                                                | 328424            | KCNRG          | 283518            | ICT Regulator               |
| Lgi1           | Leucine-rich repeat LGI family, member 1                                        | 56839             | LGI1           | 9211              | ICT Regulator               |
| Lhfp15         | Lipoma HMGIC fusion partner-like 5                                              | 328789            | LHFPL5         | 222662            | ICT Regulator               |
| Maged2         | Melanoma antigen, family D, 2                                                   | 80884             | MAGED2         | 10916             | ICT Regulator               |
| <b>Mcur1</b>   | <b>Mitochondrial Ca<sup>2+</sup> uniporter regulator 1</b>                      | <b>76137</b>      | <b>MCUR1</b>   | <b>63933</b>      | <b>ICT Regulator</b>        |
| <b>Micu1</b>   | <b>Mitochondrial Ca<sup>2+</sup> uptake 1</b>                                   | <b>216001</b>     | <b>MICU1</b>   | <b>10367</b>      | <b>ICT Regulator</b>        |
| <b>Micu2</b>   | <b>Mitochondrial Ca<sup>2+</sup> uptake 2</b>                                   | <b>68514</b>      | <b>MICU2</b>   | <b>221154</b>     | <b>ICT Regulator</b>        |
| <b>Micu3</b>   | <b>Mitochondrial Ca<sup>2+</sup> uptake family, member 3</b>                    | <b>78506</b>      | <b>MICU3</b>   | <b>286097</b>     | <b>ICT Regulator</b>        |
| Ms4a1          | Membrane-spanning 4-domains, subfamily A, member 1                              | 12482             | MS4A1          | 931               | ICT Regulator               |
| <b>Mttr6</b>   | <b>Myotubularin related protein 6</b>                                           | <b>219135</b>     | <b>MTMR6</b>   | <b>9107</b>       | <b>ICT Regulator</b>        |
| Ncs1           | Neuronal Ca <sup>2+</sup> sensor 1                                              | 14299             | NCS1           | 23413             | ICT Regulator               |
| Neto2          | Neuropilin (NRP) and tolloid (TLL)-like 2                                       | 74513             | NETO2          | 81831             | ICT Regulator               |
| Nkain1         | Na <sup>+</sup> /K <sup>+</sup> transporting ATPase interacting 1               | 67149             | NKAIN1         | 79570             | ICT Regulator               |
| Nkain2         | Na <sup>+</sup> /K <sup>+</sup> transporting ATPase interacting 2               | 432450            | NKAIN2         | 154215            | ICT Regulator               |
| Nkain3         | Na <sup>+</sup> /K <sup>+</sup> transporting ATPase interacting 3               | 269513            | NKAIN3         | 286183            | ICT Regulator               |
| Nkain4         | Na <sup>+</sup> /K <sup>+</sup> transporting ATPase interacting 4               | 58237             | NKAIN4         | 128414            | ICT Regulator               |
| Pacsin3        | Protein kinase C and casein kinase substrate in neurons 3                       | 80708             | PACSIN3        | 29763             | ICT Regulator               |
| Pdzd3          | PDZ domain containing 3                                                         | 170761            | PDZD3          | 79849             | ICT Regulator               |
| Pdzk1          | PDZ domain containing 1                                                         | 59020             | PDZK1          | 5174              | ICT Regulator               |
| Pex5l          | Peroxisomal biogenesis factor 5-like                                            | 58869             | PEX5L          | 51555             | ICT Regulator               |
| Pirt           | Phosphoinositide-interacting regulator of transient receptor potential channels | 193003            | PIRT           | 644139            | ICT Regulator               |

| Mm Gene         | Mm Full Name                                                                                  | Mm Gene ID    | Hs Gene         | Hs Gene ID   | Functional category* |
|-----------------|-----------------------------------------------------------------------------------------------|---------------|-----------------|--------------|----------------------|
| Plip            | Plasma membrane proteolipid                                                                   | 67801         | PLLP            | 51090        | ICT Regulator        |
| Pln             | Phospholamban                                                                                 | 18821         | PLN             | 5350         | ICT Regulator        |
| Prss8           | Protease, serine 8 (prostasin)                                                                | 76560         | PRSS8           | 5652         | ICT Regulator        |
| <b>Pxk</b>      | <b>PX domain containing serine/threonine kinase</b>                                           | <b>218699</b> | <b>PXK</b>      | <b>54899</b> | <b>ICT Regulator</b> |
| <b>Rrad</b>     | <b>Ras-related associated with diabetes</b>                                                   | <b>56437</b>  | <b>RRAD</b>     | <b>6236</b>  | <b>ICT Regulator</b> |
| <b>Saraf</b>    | <b>Store-operated Ca<sup>2+</sup> entry-associated regulatory factor</b>                      | <b>67887</b>  | <b>SARAF</b>    | <b>51669</b> | <b>ICT Regulator</b> |
| Sclt1           | Na <sup>+</sup> channel and clathrin linker 1                                                 | 67161         | SCLT1           | 132320       | ICT Regulator        |
| <b>Scnm1</b>    | <b>Na<sup>+</sup> channel modifier 1</b>                                                      | <b>69269</b>  | <b>SCNM1</b>    | <b>79005</b> | <b>ICT Regulator</b> |
| <b>Sco1</b>     | <b>SCO1 cytochrome c oxidase assembly protein</b>                                             | <b>52892</b>  | <b>SCO1</b>     | <b>6341</b>  | <b>ICT Regulator</b> |
| Selenok         | Selenoprotein K                                                                               | 80795         | SELENOK         | 58515        | ICT Regulator        |
| Sestd1          | SEC14 and spectrin domains 1                                                                  | 228071        | SESTD1          | 91404        | ICT Regulator        |
| <b>Slc9a3r1</b> | <b>Solute carrier family 9 (Na<sup>+</sup>/H<sup>+</sup> exchanger), member 3 regulator 1</b> | <b>26941</b>  | <b>SLC9A3R1</b> | <b>9368</b>  | <b>ICT Regulator</b> |
| Slc9a3r2        | Solute carrier family 9 (Na <sup>+</sup> /H <sup>+</sup> exchanger), member 3 regulator 2     | 65962         | SLC9A3R2        | 9351         | ICT Regulator        |
| Sln             | Sarcolipin                                                                                    | 66402         | SLN             | 6588         | ICT Regulator        |
| <b>Smdt1</b>    | <b>Single-pass membrane protein with aspartate rich tail 1</b>                                | <b>69029</b>  | <b>SMDT1</b>    | <b>91689</b> | <b>ICT Regulator</b> |
| <b>Sri</b>      | <b>Sorcin</b>                                                                                 | <b>109552</b> | <b>SRI</b>      | <b>6717</b>  | <b>ICT Regulator</b> |
| Stac            | Src homology three (SH3) and cysteine rich domain                                             | 20840         | STAC            | 6769         | ICT Regulator        |
| Stac2           | SH3 and cysteine rich domain 2                                                                | 217154        | STAC2           | 342667       | ICT Regulator        |
| Stac3           | SH3 and cysteine rich domain 3                                                                | 237611        | STAC3           | 246329       | ICT Regulator        |
| <b>Stim1</b>    | <b>Stromal interaction molecule 1</b>                                                         | <b>20866</b>  | <b>STIM1</b>    | <b>6786</b>  | <b>ICT Regulator</b> |
| <b>Stim2</b>    | <b>Stromal interaction molecule 2</b>                                                         | <b>116873</b> | <b>STIM2</b>    | <b>57620</b> | <b>ICT Regulator</b> |
| Stk39           | Serine/threonine kinase 39                                                                    | 53416         | STK39           | 27347        | ICT Regulator        |
| Stom            | Stomatin                                                                                      | 13830         | STOM            | 2040         | ICT Regulator        |
| Stoml1          | Stomatin-like 1                                                                               | 69106         | STOML1          | 9399         | ICT Regulator        |
| <b>Stoml2</b>   | <b>Stomatin-like 2</b>                                                                        | <b>66592</b>  | <b>STOML2</b>   | <b>30968</b> | <b>ICT Regulator</b> |
| Stoml3          | Stomatin (Epb7.2)-like 3                                                                      | 229277        | STOML3          | 161003       | ICT Regulator        |
| Strit1          | Small transmembrane regulator of ion transport 1                                              | 102637511     | STRIT1          | 100507537    | ICT Regulator        |
| Tcaf1           | TRPM8 channel-associated factor 1                                                             | 77574         | TCAF1           | 9747         | ICT Regulator        |
| Tcaf2           | TRPM8 channel-associated factor 2                                                             | 232748        | TCAF2           | 285966       | ICT Regulator        |
| Tesc            | Tescalcin                                                                                     | 57816         | TESC            | 54997        | ICT Regulator        |
| <b>Tm9sf4</b>   | <b>Transmembrane 9 superfamily protein member 4</b>                                           | <b>99237</b>  | <b>TM9SF4</b>   | <b>9777</b>  | <b>ICT Regulator</b> |
| Tmem100         | Transmembrane protein 100                                                                     | 67888         | TMEM100         | 55273        | ICT Regulator        |
| Tmem150c        | Transmembrane protein 150C                                                                    | 231503        | TMEM150C        | 441027       | ICT Regulator        |
| Tmem199         | Transmembrane protein 199                                                                     | 195040        | TMEM199         | 147007       | ICT Regulator        |
| Tmem266         | Transmembrane protein 266                                                                     | 244886        | TMEM266         | 123591       | ICT Regulator        |
| Tmem64          | Transmembrane protein 64                                                                      | 100201        | TMEM64          | 169200       | ICT Regulator        |
| Trdn            | Triadin                                                                                       | 76757         | TRDN            | 10345        | ICT Regulator        |
| <b>Trpc4ap</b>  | <b>Transient receptor potential cation channel, subfamily C, member 4 associated protein</b>  | <b>56407</b>  | <b>TRPC4AP</b>  | <b>26133</b> | <b>ICT Regulator</b> |
| Unc79           | Unc-79 homolog                                                                                | 217843        | UNC79           | 57578        | ICT Regulator        |
| Unc80           | Unc-80, NALCN activator                                                                       | 329178        | UNC80           | 285175       | ICT Regulator        |
| <b>Uqcrb</b>    | <b>Ubiquinol-cytochrome c reductase binding protein</b>                                       | <b>67530</b>  | <b>UQCRB</b>    | <b>7381</b>  | <b>ICT Regulator</b> |
| Vstm4           | V-set and transmembrane domain containing 4                                                   | 320736        | VSTM4           | 196740       | ICT Regulator        |
|                 |                                                                                               |               |                 |              |                      |
| Car1            | Carbonic anhydrase 1                                                                          | 12346         | CA1             | 759          | Enzymatic            |
| Car11           | Carbonic anhydrase 11                                                                         | 12348         | CA11            | 770          | Enzymatic            |
| Car12           | Carbonic anhydrase 12                                                                         | 76459         | CA12            | 771          | Enzymatic            |

| <b>Mm Gene</b> | <b>Mm Full Name</b>                         | <b>Mm Gene ID</b> | <b>Hs Gene</b> | <b>Hs Gene ID</b> | <b>Functional category*</b> |
|----------------|---------------------------------------------|-------------------|----------------|-------------------|-----------------------------|
| Car13          | Carbonic anhydrase 13                       | 71934             | CA13           | 377677            | Enzymatic                   |
| Car14          | Carbonic anhydrase 14                       | 23831             | CA14           | 23632             | Enzymatic                   |
| Car2           | Carbonic anhydrase 2                        | 12349             | CA2            | 760               | Enzymatic                   |
| Car3           | Carbonic anhydrase 3                        | 12350             | CA3            | 761               | Enzymatic                   |
| Car4           | Carbonic anhydrase 4                        | 12351             | CA4            | 762               | Enzymatic                   |
| Car5a          | Carbonic anhydrase 5a, mitochondrial        | 12352             | CA5A           | 763               | Enzymatic                   |
| <b>Car5b</b>   | <b>Carbonic anhydrase 5b, mitochondrial</b> | <b>56078</b>      | <b>CA5B</b>    | <b>11238</b>      | <b>Enzymatic</b>            |
| Car6           | Carbonic anhydrase 6                        | 12353             | CA6            | 765               | Enzymatic                   |
| Car7           | Carbonic anhydrase 7                        | 12354             | CA7            | 766               | Enzymatic                   |
| Car9           | Carbonic anhydrase 9                        | 230099            | CA9            | 768               | Enzymatic                   |
| <b>Fth1</b>    | <b>Ferritin heavy polypeptide 1</b>         | <b>14319</b>      | <b>FTH1</b>    | <b>2495</b>       | <b>Enzymatic</b>            |
| <b>Ftl1</b>    | <b>Ferritin light polypeptide 1</b>         | <b>14325</b>      | <b>FTL</b>     | <b>2512</b>       | <b>Enzymatic</b>            |
| Ftmt           | Ferritin mitochondrial                      | 67634             | FTMT           | 94033             | Enzymatic                   |
| Heph           | Hephaestin                                  | 15203             | HEPH           | 9843              | Enzymatic                   |
| Heph1          | Hephaestin-like 1                           | 244698            | HEPHL1         | 341208            | Enzymatic                   |
| Nox1           | NADPH oxidase 1                             | 237038            | NOX1           | 27035             | Enzymatic                   |

**Supplemental Table 2. Related to Methods. shRNAs, sgRNAs and plasmids used for deletion or overexpression of genes.**

| Reagent or Resource   | Vector                    | Target sequence (for shRNA)                                                                        |
|-----------------------|---------------------------|----------------------------------------------------------------------------------------------------|
| sgControl             | pMRI-Ametrine             | sg1: GAGCAGCGTCTTCGAGAGTG                                                                          |
| sgSting               | pMRI-Ametrine             | sg1: TATCTCGGAATCGAATGTTG<br>sg2: GAAGGCCAAACATCCAAC TG                                            |
| sgTrp53               | pMRI-Ametrine             | sg1: GAAGTCACAGCACATGACGG<br>sg2: AACAGATCGTCCATGCAGTG                                             |
| shLrrc8a              | pLMPd-Ametrine or mCherry | sh1: ACAGCCTCAAGAAGATGGTTAA<br>sh2: TCCATGGACAAGAAGTCATCTA                                         |
| shLrrc8c              | pLMPd-Ametrine            | sh1: TCCAGTTCACAGTGGACTGTAA<br>sh2: CAGCGAGAACAAGTTAAAACAA                                         |
| shRenilla.713         | pLMPd-Ametrine or mCherry | sh1: TAGGAATTATAATGCTTATCTA                                                                        |
| Reagent or Resource   | Vector                    | Sequence                                                                                           |
| MSCV-Empty vector     | pMSCV-IRES-mCherry        | for plasmid map compare Addgene 52114                                                              |
| MSCV-LRRC8C-Flag      | pMSCV-IRES-mCherry        | murine <i>Lrrc8c</i> , Ref Seq NM_133897.2. CDS: nt 236-2647. Source: Dharmacon, MMM1013-202767571 |
| MSCV-LRRC8C-ΔEx4-Flag | pMSCV-IRES-mCherry        | murine <i>Lrrc8c</i> , nt 236-373 from Ref Seq NM_133897.2.                                        |
| MSCV-p53              | pMSCV-IRES-Ametrine       | murine <i>Trp53</i> , Ref Seq NM_011640.3, CDS: nt 158-1330. Source: Sino Biological, MG50534-UT   |

**Supplemental Table 3. Related to Methods. Antibodies used for flow cytometry**

| Antigen                                | Source                | Clone                         | Conjugation           | Intracellular staining        |
|----------------------------------------|-----------------------|-------------------------------|-----------------------|-------------------------------|
| B220                                   | eBioscience           | RA3-6B2                       | FITC                  | n/a                           |
| CD11b                                  | BioLegend             | M1/70                         | PE-Cy7                | n/a                           |
| CD11c                                  | BioLegend             | N418                          | Pacific Blue          | n/a                           |
| CD138                                  | BioLegend             | 281-2                         | PE                    | n/a                           |
| CD25                                   | eBioscience           | PC61 .5                       | PE                    | n/a                           |
| CD279 (PD-1)                           | BioLegend             | 29F.1A12                      | PE-Cy7                | n/a                           |
| CD3e                                   | eBioscience           | 145-2C11                      | eFluor 450            | n/a                           |
| CD38                                   | eBioscience           | 90                            | APC                   | n/a                           |
| CD4                                    | eBioscience/BioLegend | GK1.5                         | PE-Cy7/BV510          | n/a                           |
| CD44                                   | eBioscience/BioLegend | IM7                           | FITC, Pacific Blue    | n/a                           |
| CD45.1                                 | eBioscience           | A20                           | eFluor 450            | n/a                           |
| CD45.2                                 | eBioscience           | 104                           | Per-CP Cy5.5          | n/a                           |
| CD62L                                  | BioLegend             | MEL-14                        | Per-CP Cy5.5          | n/a                           |
| CD8a                                   | eBioscience           | 53-6.7                        | FITC, PE, APC         | n/a                           |
| CD80                                   | eBioscience           | 16-10A1                       | APC                   | n/a                           |
| CXCR5                                  | eBioscience           | SPRCL5                        | Per-CP Cy5.5          | n/a                           |
| GL.7                                   | BioLegend             | GL7                           | AF488                 | n/a                           |
| MOG <sub>38-49</sub> I(A) <sup>b</sup> | NIH tetramer Core     | ---                           | APC                   | n/a                           |
| GM-CSF                                 | BioLegend             | MP1-22E9                      | Per-CP Cy5.5          | IC staining Kit (eBioscience) |
| IFN- $\gamma$                          | eBioscience           | XMG1.2                        | PE                    | IC staining Kit (eBioscience) |
| IL-2                                   | eBioscience           | JES6-5H4                      | FITC                  | IC staining Kit (eBioscience) |
| IL-17a                                 | BioLegend             | TC11-18H10.1                  | FITC                  | IC staining Kit (eBioscience) |
| FLAG (1 <sup>st</sup> )                | Sigma                 | M2                            | Unconjugated (mouse)  | IC staining Kit (eBioscience) |
| Mouse IgG (2 <sup>nd</sup> )           | Thermo Fisher         | Polyclonal                    | AF647                 | IC staining Kit (eBioscience) |
| LRRC8C                                 | YenZym (custom-made)  | custom-made rabbit polyclonal | Unconjugated (rabbit) | IC staining Kit (eBioscience) |
| ORAI1                                  | YenZym                | custom-made rabbit polyclonal | Unconjugated          | IC staining Kit (eBioscience) |
| Rabbit IgG (2 <sup>nd</sup> )          | Thermo Fisher         | Polyclonal                    | AF647                 | IC staining Kit (eBioscience) |
| STIM1                                  | YenZym (custom-made)  | custom-made rabbit polyclonal | Unconjugated          | IC staining Kit (eBioscience) |
| TNF- $\alpha$                          | eBioscience           | MP6-XT22                      | APC                   | IC staining Kit (eBioscience) |
| Foxp3                                  | eBioscience           | FJK-16s                       | FITC                  | TF staining kit (eBioscience) |
| Ki67                                   | eBioscience           | SolA15                        | PE                    | TF staining kit (eBioscience) |
| p53                                    | Cell Signaling Tech.  | 1C12                          | AF488                 | TF staining kit (eBioscience) |

**Supplemental Table 4. Related to Methods. Primers used for RT-qPCR**

| <b>Gene name</b>            | <b>Forward primer</b>   | <b>Reverse primer</b>    |
|-----------------------------|-------------------------|--------------------------|
| mouse <i>Apa1</i>           | AGTGGCAAGGACACAGATGG    | GGCTTCCGCAGCTAACACA      |
| mouse <i>Bax</i>            | TGAAGACAGGGGCCTTTTTG    | AATTCGCCGGAGACACTCG      |
| mouse <i>Ccng1</i>          | ACAACCTGACTCTCAGAAACTGC | CATTATCATGGGCCGACTCAAT   |
| mouse <i>Cdkn1a</i>         | CCTGGTGATGTCCGACCTG     | CCATGAGCGCATCGCAATC      |
| Mouse <i>Gapdh</i>          | AAGCTCATTTCCTGGTATGACA  | CTTGCTCAGTGTCTTGCTG      |
| mouse <i>Lrrc8a</i>         | GCTGTGTGTCCGCAAAGTAG    | AGACAGGGACCAGCCTCAG      |
| mouse <i>Lrrc8b</i>         | GGTTCGCCAAGTTTTTCCCC    | GTCCAAGCACTTGTGGAGGA     |
| mouse <i>Lrrc8c-Exon1-3</i> | AACTCGGTCACCGGAATCAT    | CCCCAGAGATTAATGTGGCT     |
| mouse <i>Lrrc8c-Exon3</i>   | ATTCGGTGACCGAGTTCC      | CATCCAAACACTCCGATCATCAG  |
| mouse <i>Lrrc8c-Exon4</i>   | TGCTGATGATCGGAGTGTTTG   | GGTTGGTCGGTGAGGGTTT      |
| mouse <i>Lrrc8d</i>         | TGCCCCGGAAGGAAGTG       | CCCACCATGGCTTCAGGATT     |
| mouse <i>Lrrc8e</i>         | GCTGCTCTGTGAACTGCTTG    | CAGGCATCTAGAAGTTGGGC     |
| mouse <i>Rpl32</i>          | CCCAACATCGGTTATGGGAGCA  | GATGGCCAGCTGTGCTGC       |
|                             |                         |                          |
| influenza PR8- M1/M2        | GGACTGCAGCGTTAGACGCTT   | CATCCTGTTGTATATGAGGCCCAT |

**References**

- 1 Lin, J. X. *et al.* Critical Role of STAT5 transcription factor tetramerization for cytokine responses and normal immune function. *Immunity* **36**, 586-599, doi:10.1016/j.immuni.2012.02.017 (2012).
